# Supplementary material for: Brain region-specific spread of Lewy body pathology in synucleinopathies is governed by α-synuclein conformations.
Source: Research Square preprint supplement (doi:10.21203/rs.3.rs-294515/v1), 2021-03-10
Supplement: Supplementary file 1 [file 77a5f111352126b5367988d1.pdf]

**Brain region-specific spread of Lewy body pathology in synucleinopathies is governed by  
 $\alpha$ -synuclein conformations.**

Laura de Boni<sup>1,2</sup>, Aurelia Hays Watson<sup>1</sup>, Ludovica Zaccagnini<sup>1</sup>, Nora Kim<sup>3</sup>, John Sanderson<sup>4</sup>,  
Haiyang Jiang<sup>5</sup>, Elodie Martin<sup>1</sup>, Adam Cantlon<sup>5</sup>, Matteo Rovere<sup>7</sup>, Lei Liu<sup>5</sup>, Marc Sylvester<sup>7</sup>,  
Tammarn Lashley<sup>8</sup>, Ulf Dettmer<sup>5</sup>, Zane Jaunmuktane<sup>8,9,10</sup>, Tim Bartels<sup>1\*</sup>

Correspondence to: [t.bartels@ucl.ac.uk](mailto:t.bartels@ucl.ac.uk)

**This file includes:**

Materials and Methods  
Figs. S1 to S25  
Table S1 and S2

## **Materials and Methods**

**Brain samples.** The experimental use of human brain samples was approved under the protocol number 1999P001180 ('Aging In The Brain: Role Of Fibrous Proteins') by the Partners Human Research Committee, the Institutional Review Board of Partners Research Management and the REC reference 18/LO/0721 ('Queen Square Brain Bank for Neurological Disorders').

**cDNA cloning.** Single-mutation  $\alpha$ S expression plasmids were generated from the pcDNA4 or pcDNA3/ $\alpha$ S plasmid<sup>9</sup> using the QuikChange II site-directed mutagenesis kit and appropriate primers.

**Cell lines and transfection.** Cells were cultured at 37 °C in 5 % CO<sub>2</sub>. Human BE (2)-M17 neuroblastoma cells (called M17D, ATCC number CRL-2267) were cultured in DMEM/F12 GlutaMAX (Thermo Fisher Scientific), 10 % fetal bovine serum (Sigma) and 1 % Penicillin/Streptomycin. Prior to the transfection, cells were seeded at a density of  $1.5 \times 10^6$  cells per 6 cm dish. HEK cells were cultured in DMEM with 10% fetal bovine serum (Thermo Fisher Scientific), 1 % Penicillin/Streptomycin and L-glutamine (2 mM, Gibco). Transfections with  $\alpha$ S wild type and fPD mutants (A30P, E46K, G51D, A53T, H50Q) were carried out using Lipofectamine 2000 according to the manufacturer's instructions. Cells were harvested 48 h after transfection, pelleted, snap frozen and further processed by crosslinking. HEK293  $\alpha$ S C-term Strep II-tagged lysates were purchased from GeneScript.

**Protein extraction.** Frozen brain or cell pellet samples were manually homogenized in 1x PBS / protease inhibitor / phosphatase inhibitor (Sigma, Thermo Fisher Scientific). Tissue suspensions were lysed by sonication (Sonic Dismembrator model 300, setting 40 for 15 seconds at 4 °C or

Fisher Scientific Model 705 Sonic Dismembrator, sonication of amplitude 5 % for 15 seconds at 4 °C). Samples were ultracentrifuged at 100,000g for 1 hour at 4 °C. The resultant supernatant contained soluble proteins. To separate membrane proteins from insoluble proteins, the pellet from the homogenized brain tissue was resuspended in 1 ml OG-RIPA buffer (0.5 % Nonidet P-40 substitute (NP-40, Pan Reac), 0.5 % sodium deoxycholate (Sigma), 0.1 % sodium dodecyl sulfate (SDS, Sigma), 10 mM calcium chloride dihydrate (Sigma) with 2 % n-octyl- $\beta$ -D-glucoside (abcam) and centrifuged at 175,000g for 30 min at 4 °C. The supernatant containing membrane-associated proteins was collected. The remaining pellet containing insoluble proteins was re-suspended in 200  $\mu$ l 8 M urea (Sigma) / 5 % SDS (Sigma) / PBS (Sigma), sonicated for 30 s (5 s on, 5 s off setting, amplitude 20 %, room temperature (RT), Fisher Scientific Model 705 Sonic Dismembrator), and boiled for 10 min at 100 °C. Protein concentrations were measured with the Pierce BCA protein assay kit (Thermo Fisher Scientific) according to the manufacturer's instructions.

**Purification of  $\alpha$ S from erythrocytes:** Freshly collected and washed erythrocytes were resuspended in 3-fold volume of ACK lysing buffer (Lonza, Walkersville MD, USA). (NH<sub>4</sub>)<sub>2</sub>SO<sub>4</sub> to a final concentration of 25 % was added and incubated at 4 °C for 30 min. The lysate was centrifuged (20,000g, 20 min), and the supernatant brought up to 50 % (NH<sub>4</sub>)<sub>2</sub>SO<sub>4</sub>. The pellet was washed several time in 55 % (NH<sub>4</sub>)<sub>2</sub>SO<sub>4</sub> to remove excess hemoglobin. The sample was centrifuged at 20,000g for 20 min and the pellet resolubilized in 50-fold volume of 50 mM phosphate buffer, pH 7.0, 1 M (NH<sub>4</sub>)<sub>2</sub>SO<sub>4</sub>. 5 ml of the resultant solution were injected onto a 5 ml HiTrap phenyl hydrophobic interaction column (GE Healthcare) equilibrated with 50

mM phosphate buffer, pH 7.0, 1 M (NH<sub>4</sub>)<sub>2</sub>SO<sub>4</sub>. αS was eluted with a 1 M to 0 M (NH<sub>4</sub>)<sub>2</sub>SO<sub>4</sub> gradient in 50 mM phosphate buffer, pH 7.0 (αS eluted at ~0.75 M (NH<sub>4</sub>)<sub>2</sub>SO<sub>4</sub>).

**Crosslinking of lysate.** 20 µg of total protein in a total volume of 25 µl were incubated with 10 µl 5 mM DSG (Thermo Fisher Scientific, final concentration 1.43 mM, DSG was first dissolved in 50 µl of anhydrous DMSO and further in PBS pH 7.4 to a final volume of 1 ml) for 30 min at 37 °C shaking or rotating. The reaction was quenched with 3.5 µl 1 M Tris-HCl pH 7.6 (Sigma) for 5 min shaking at RT. Samples were analysed in biological duplicates and technical triplicates. The crosslinker Disuccinimidyl suberate (DSS, Thermo Scientific Pierce) was used for validation.

**Immunoblotting (Western blot, WB).** Samples were boiled at 90 °C in 10 µl 4x NuPage LDS sample buffer (Novex)/1:10 β-Mercaptoethanol (Sigma) for 5 min. Samples were electrophoresed at maximum 200 V on NuPAGE Bis Tris Midi gels (Invitrogen) with NuPage MES-SDS running buffer (Invitrogen) and the SeeBlue Plus2 pre-stained molecular weight marker (Invitrogen). The total volume of each sample containing 20 µg total protein was loaded on each lane. After electrophoresis, gels were incubated in 20 % ethanol (Decon Laboratories) for 5 min at RT and electroblotted onto iBlot 2 NC Regular Stacks (Invitrogen) using the iBlot Dry Blotting preset 7 min blotting program. The membrane was briefly rinsed in ultrapure water and incubated in 4 % paraformaldehyde/PBS (Alfa Aesar) for 30 min at RT. Some membranes were stained with 0.1 % Ponceau (Biotium) and rinsed with ultrapure water. Membranes were blocked in Odyssey blocking buffer (PBS)/PBS buffer 1:1 (LI-COR) or Casein buffer 0.5 % (BioRad) for 30 min at RT. After blocking, membranes were incubated with primary antibodies

overnight at 4 °C. Membranes were briefly rinsed in PBS-Tween 0.1 % and then washed 3 x 10 min in PBS-Tween 0.1 %. Membranes were incubated with the corresponding secondary LI-COR antibodies (1:20,000 in Odyssey blocking buffer (PBS)/PBS 1:1/Tween 0.1 % at RT for 1 h in the dark. Membranes were briefly rinsed in PBS-Tween 0.1 % and then washed 3 x 10 min in PBS-Tween 0.1 % in the dark. Membranes were imaged on a LI-COR Odyssey CLx imaging system (settings: custom, western, quality low, resolution 169  $\mu$ m, focus offset 0.0, auto intensity).

**Antibodies.** Antibodies used were Syn1 to  $\alpha$ S (clone 42, 610786, Becton-Dickinson, WB 1:500), 2F12 to  $\alpha$ S(1) (MABN1817, Merck, WB 1:5,000), SOY1 to  $\alpha$ S (MABN1818, Merck), 15G7 to  $\alpha$ S(2) (hybridoma supernatants, generously contributed by U.D., WB 1:50), C20 to  $\alpha$ S (sc-7011-R, Santa Cruz, WB 1:5,000), H3C to  $\alpha$ S (Developmental Studies Hybridoma Bank, WB 1:50), 4B12 to  $\alpha$ S (MA1-90346, Thermo Fisher Scientific, WB 1:5,000), 211 to  $\alpha$ S (32-8100, Thermo Fisher Scientific, WB 1:1,000), MJFR1 to  $\alpha$ S (ab138501, abcam, WB 1:1,000), 202 to  $\alpha$ S (836601, Biolegend, WB 1:1,000), anti-DJ-1(3) (or GeneTex, WB 1:2,000). Anti-Tau (EP2456Y, abcam, WB 1:5,000), anti- $\beta$  Tubulin III (T2200, Sigma-Aldrich, WB 1:5,000), anti-Heat Shock Protein 70 (HSP70, ab181606, abcam, WB 1:1,000), anti-14-3-3 beta (ab15260, abcam, WB 1:500), anti- $\beta$  Actin (ab8227, abcam, WB 1:5,000), anti-HSP90 (HEK: ab clone 16F1, ADI-SPA-83, Enzo, WB 1:1,000, hubrain: ab PA3-013, Invitrogen, WB 1:500).

**$\alpha$ S-specific ELISA.** Multi-Array 96 HB plates (MSD) were coated with the capture antibody anti- $\alpha$ S 2F12 (200 ng 2F12(1) in PBS, 30  $\mu$ l per well) and incubated over night at 4 °C. The next day, the remaining liquid was removed and the plates were blocked with 5 % Blocker A (MSD)

in PBS-Tween 0.1 % (150  $\mu$ l per well, Sigma) shaking for 2 hours at RT. Plates were washed 5x with PBS-Tween 0.1 % (150  $\mu$ l per well). Standards (recombinant  $\alpha$ S, highest concentration 1 ng, ratio for serial dilution 1:4, 30  $\mu$ l per well) and protein (30  $\mu$ l per well, soluble protein fraction 1:500, membrane (OG-RIPA) and insoluble (UREA/SDS fraction 1:100) were diluted in 1 % Blocker A in PBS-Tween 0.1 % and the plates were incubated shaking for 2 hours at RT. The remaining liquid was removed and the plates were washed 5x with PBS-Tween 0.1 % (150  $\mu$ l per well). The sulfo-tagged detection antibody SOY1 (50 ng SOY1 in 1 % Blocker A (MSD)/PBS-Tween 0.1 %, 30  $\mu$ l per well) was added and the plate incubated shaking for 1 hour at RT in the dark. Remaining liquid was removed and plates were washed 5x with PBS-Tween 0.1 % (150  $\mu$ l per well). 2x read buffer (MSD)/MilliQ water was added (150  $\mu$ l per well) and the plates were immediately measured using a MSD Sector 2400 imager or MSD Model No. 1300, QuickPlex SQ 120 according to the manufacturer's instructions. All samples and standards were analyzed in technical duplicates.

**Immunoprecipitation of  $\alpha$ S.**  $\alpha$ S from brain tissue was immunoprecipitated using the Pierce Direct IP Kit (Thermo Fisher Scientific) according to the manufacturer's instructions. The 2F12 to  $\alpha$ S(I) was used as a capture antibody (300  $\mu$ g per reaction). At least, 800  $\mu$ g total protein were used for each crosslinking of lysate reaction using 5 mM DSG (final concentration in total volume 1.43 mM). Volumes of wash and incubation buffers were adapted to the total volume input of the sample. Elution fractions were further concentrated using Amicon concentration columns (Millipore) according to the manufacturer's instructions. The fractions were checked for the presence of  $\alpha$ S monomer and multimer using immunoblotting and Coomassie staining. Negative controls included the incubation and clearance of samples using the Pierce Control

Agarose Resin (non-amine reactive) and the incubation of samples on the AminoLink Plus™ Coupling Resin column without any antibody. Normal mouse IgG was used as a positive control (200 µg per AminoLink Plus™ Coupling Resin column, sc-2025, Santa Cruz Biotechnology). αS from HEK293 αS C-term Strep II-tagged lysates was immunoprecipitated using StrepTrap 5ml columns. Briefly, cells were lysed, ultracentrifuged (100,000g at 4 °C for one hour and the protein content measured in the supernatant. Crosslinking was performed according the protocol above and the crosslinked lysate loaded onto equilibrated Strep Tag 5 ml columns. Unbound samples was washed out with PBS buffer pH 7.4 and the sample eluted with elution buffer (2.5 mM desthiobiotin in PBS pH 7.4). For mock controls, HEK without αS tag were subjected to immunoprecipitation.

**Size exclusion chromatography (SEC).** Immunoprecipitated αS fractions were injected on a Superdex 200 (10/300 GL) column (GE Healthcare) at room temperature and eluted with 50 mM NH<sub>4</sub>Ac (pH 7.4) while measuring (in-line) the conductivity and the 280-nm absorption of the eluate at 0.7 mL/min. For size estimation, a gel filtration standard (Bio-Rad) was run on the column, and the calibration curve was obtained by semilogarithmic plotting of molecular weight versus the elution volume divided by the void volume. Immunoblotting was performed to identify the fractions containing αS multimers and monomers.

**Circular Dichroism Spectroscopy (CDS).** After SEC separation, samples containing αS multimers or monomers, were exchanged into 10 mM ammonium acetate using Zeba spin desalting columns (Thermo Fisher), lyophilized, and resuspended in 10 mM ammonium acetate at a concentration of approximately 10 µM. αS samples were added to a 1 mm path length quartz

cuvette for far-UV CD and analyzed using a J-1500 CD spectrometer (Jasco) at 25 °C.

Temperature control with an accuracy of 0.1 °C was achieved with a heating/cooling accessory equipped with a Peltier element (PFD-425S) connected to a water thermostatic bath. Buffer spectra were recorded and subtracted.

**Multi-angled light scattering (MALS).** Immunoprecipitated and SEC-separated  $\alpha$ S multimers and monomers were loaded at a flow rate of 0.15 mL/min onto a Superdex 200 3.2/300 GL Increase column (GE Healthcare) previously equilibrated in 50 mM ammonium acetate pH 7.4. The column was connected in line to a Dawn 8+ MALS detector (Wyatt Technology) using a laser emitting at 690 nm and by refractive index measurement using an Optilab T-rex (Wyatt Technology Corp.).

**PFF generation.** 5 mg/ml recombinant  $\alpha$ S in PBS was aggregated for 3 days at 37 °C with nutation to form Thioflavin T positive fibrils. To generate soluble PFFs,  $\alpha$ S fibrils were diluted to 1 mg/ml and sonicated at power level 50 for 3 x 10 s using a Sonic Dismembrator model 300 (Fisher). Aliquots of the resultant material were flash-frozen in liquid nitrogen and stored at -80 °C.

**Preformed-fibril (PFF) transfection.** All reagents were purchased from Thermo Fisher Scientific unless otherwise noted. Transfected M17D were incubated with 0.5  $\mu$ g/ml  $\alpha$ S PFF. After 48h, the medium was aspirated, cells were harvested by scraping, and washed 2 x in cold PBS (500g spin for 5 min). Cell pellets were resuspended in 1x PBS / protease inhibitor and sonicated with a Sonic Dismembrator model 300 (microtip setting 40; 2 x 15 s). Cells were spun



at 20,000g for 10 min. The supernatant was kept (“cytosol”) and the pellet was incubated in 1 % triton X-100 at 4 °C for 30 min under nutation. After a 20,000g spin for 10 min, the supernatant was kept (“membrane fraction”) and the pellet dissolved in 5 % SDS at 100 °C for 10 min to give “insoluble  $\alpha$ S” fraction. Relative  $\alpha$ S content in each fraction was analyzed by SDS-PAGE Western blot and ELISA.

**Thioflavin T (ThT) binding.** To detect amyloid fibril growth, a discontinuous assay was used. Aliquots (10  $\mu$ L) were removed from each purified  $\alpha$ S sample (lyophilized from 50 mM ammonium acetate, pH 7.4, and agitated at 37 °C at a concentration of 75  $\mu$ M in 20 mM Bis-Tris propane, 100 mM LiCl, pH 7.4) and added to 2 mL of a 10  $\mu$ M Thioflavin T (ThT) solution in 10 mM glycine buffer, pH 9. Fluorescence was directly quantified on a Varian Eclipse fluorescence spectrophotometer at 20 °C by exciting at 444 nm and scanning the emission wavelengths from 460 to 550 nm with slit widths set at 5 nm (PMT at 750 V).

**Preparation of paraffin sections.** Frozen tissue blocks were embedded in paraffin by the Specialized Histopathology Services Core at the Brigham and Women’s Hospital, Boston, Ma, USA. The core also provided 6  $\mu$ m sections. In total, 5 controls (control #4, control #5, control #6, control #18, control #19), 5 DLB (DLB #15, DLB, #16, DLB #19, DLB #21, DLB #22) and 4 sporadic PD (PD #10, PD #7, PD #11, PD #12) samples were processed.

**Immunostaining.** 6  $\mu$ m paraffin sections were dewaxed in xylenes and rehydrated through an ethanol series into water. Antigen retrieval was performed by boiling the slides in citrate buffer, pH 6.0, for 15 minutes. Slides were blocked in 2 % milk in PBS with 0.3 % triton X-100 for 1

hour, and were then incubated with the 5G4 antibody to  $\alpha$ S (Sigma) at 1:5,000 at RT overnight. Slides were then incubated in biotin-conjugated secondary antibodies in 2 % milk in PBS with 0.3 % triton X-100 for 2 hours (1:200, Southern Biotech) followed by avidin-biotin-peroxidase complex (Vectastain Elite) in PBS for 2 hours. Histochemical detection was performed with diaminobenzidine (ImmPACT DAB, Vector). Stainings were performed by our collaborators Prof. M. Feany and her team from the Department of Pathology, Brigham and Women's Hospital, Boston, MA, USA.

**Mass spectrometry:** HEK293  $\alpha$ S C-term Strep II-tagged lysates were crosslinked and immunoprecipitated as described above and the  $\alpha$ S<sup>CH</sup> and  $\alpha$ S<sup>CU</sup> were separated via SEC and run on a SDS-gel. Gel pieces containing the bands of interest were cut out and the gel pieces were lyophilized prior Mass spectrometry analysis. Gel slices were subjected to gel digestion. In brief, slices were washed consecutively with water, 50 % acetonitrile (ACN), and 100 % ACN. Proteins were reduced with 20 mM DTT in 50 mM ammonium bicarbonate and alkylated with 40 mM acrylamide (in 50 mM bicarbonate). The slices were washed again and dehydrated with ACN. Proteolysis was performed with 330 ng chymotrypsin or trypsin (sequencing grade Promega, Mannheim, Germany) at 37 °C overnight. The peptide extracts were dried in a vacuum concentrator and stored at -20 °C. Dried peptides were dissolved in 10  $\mu$ l 0.1 % formic acid (solvent A). 2  $\mu$ l were injected onto a C18 analytical column (self-packed 300 mm length, 100  $\mu$ m inner diameter, ReproSil-Pur 120 C18-AQ, 3  $\mu$ m, Dr. Maisch GmbH, Ammerbuch-Entringen, Germany). Peptides were separated during a linear gradient from 2 % to 35 % solvent B (90 % acetonitrile, 0.1 % formic acid) within 90 min at a flow rate of 300 nl/min. The nanoHPLC was coupled online to an Orbitrap Lumos mass spectrometer (Thermo Fisher

Scientific, Bremen, Germany). Peptide ions between 330 and 1600 m/z were scanned in the Orbitrap detector with a resolution of 60,000 (maximum injection time 50 ms, AGC target 400,000). Precursor ions (threshold 25,000) were subjected to higher energy collision induced dissociation within a 2.5 s cycle and fragments were analyzed in the Orbitrap detector (maximum injection time 22 ms, resolution = 15,000). Fragmented peptide ions were excluded from repeat analysis for 15 s.

**Statistics.** Western Blot: Ratio of protein multimers to monomers was analysed using the Image Studio software western analysis according to the manufacturer instructions (background subtraction: median, border with 3, top/bottom). Data analysis (except for correlation and regression analysis) was performed using GraphPad Prism 7 (GraphPad Software, La Jolla, CA, USA). Statistical significance was determined by Mann Whitney test ( $p < 0.05$ , two-tailed). Samples are displayed as mean  $\pm$  SD.

Correlation analysis was performed using the computing environment R (RStudio, Version 3.5.2) and Pearson correlation test. Additional software packages included “devtools” (<https://github.com/r-lib/devtools>), “easyGgplot2” (<https://github.com/kassambara/easyGgplot2>) and „Hmisc“ (<https://github.com/harrelfe/Hmisc>). Samples were coded as follows: Gender male = 1, female = 2. McKeith: neocortical = 3, limbic = 2, brainstem = 1, controls (no McKeith staging) were set to 0. CERAD: none = 0, sparse = 1, mild = 2, mderate = 3, frequent = 4. Braak LB staging: controls were set to 0, PD and DLB patients were coded according to evaluated Braak LB staging.

ELISA: Raw data from the MSD Discovery Workbench was imported into Excel 2010 (Microsoft) for background calculation and subtraction. Values from excel were imported into

GraphPad Prism 7 (GraphPad Software, La Jolla, CA, USA) for interpolation together with the known standard concentrations (standard curve: sigmoidal, 4PL, X is log (concentration, no special handling for outliers). Final concentration of each analyzed sample was calculated in Excel according to the dilution factor.

Mass spectrometry: Raw data processing and analysis of database searches were performed with Proteome Discoverer software 2.4.0.305 (Thermo Fisher Scientific). The protein-specific peptide identification was done with an in house Mascot server version 2.6.1 (Matrix Science Ltd, London, UK) from Proteome Discoverer. MS2 data were searched against a database of common contaminants (cRAP of the Global Proteome Machine), and human SwissProt sequences. Precursor Ion m/z tolerance was 10 ppm, fragment ion tolerance 0.02 Da. Tryptic peptides with up to two missed cleavages were searched, propionamide set as a static modification of cysteines, oxidation as a dynamic modification of methionine. Mascot results from searches against SwissProt were sent to the Percolator algorithm<sup>3</sup> version 3.02 as implemented in Proteome Discoverer 2.4. If the data did not permit use of Percolator, PSMs were evaluated by a target-decoy procedure. Spectra without high confident (FDR 1 %) matches were sent to a second round Mascot search with semi-specific enzyme cleavage. The false discovery rate of proteins in these samples is 0.6 %.

#### References:

1. U. Dettmer, A. J. Newman, E. S. Luth, T. Bartels, D. Selkoe, In vivo cross-linking reveals principally oligomeric forms of  $\alpha$ -synuclein and  $\beta$ -synuclein in neurons and non-neural cells. *J. Biol. Chem.* **288**, 6371–6385 (2013).
2. P. J. Kahle, M. Neumann, L. Ozmen, V. Muller, H. Jacobsen, A. Schindzielorz, M.

- Okochi, U. Leimer, H. van Der Putten, A. Probst, E. Kremmer, H. A. Kretschmar, C. Haass, Subcellular localization of wild-type and Parkinson's disease-associated mutant alpha -synuclein in human and transgenic mouse brain. *J. Neurosci.* **20**, 6365–6373 (2000).
3. S. Baulac, M. J. LaVoie, J. Strahle, M. G. Schlossmacher, W. Xia, Dimerization of Parkinson's disease-causing DJ-1 and formation of high molecular weight complexes in human brain. *Mol. Cell. Neurosci.* **27**, 236–246 (2004).

**Fig. S1 Crosslinking protocol for tissue and cell lysates**

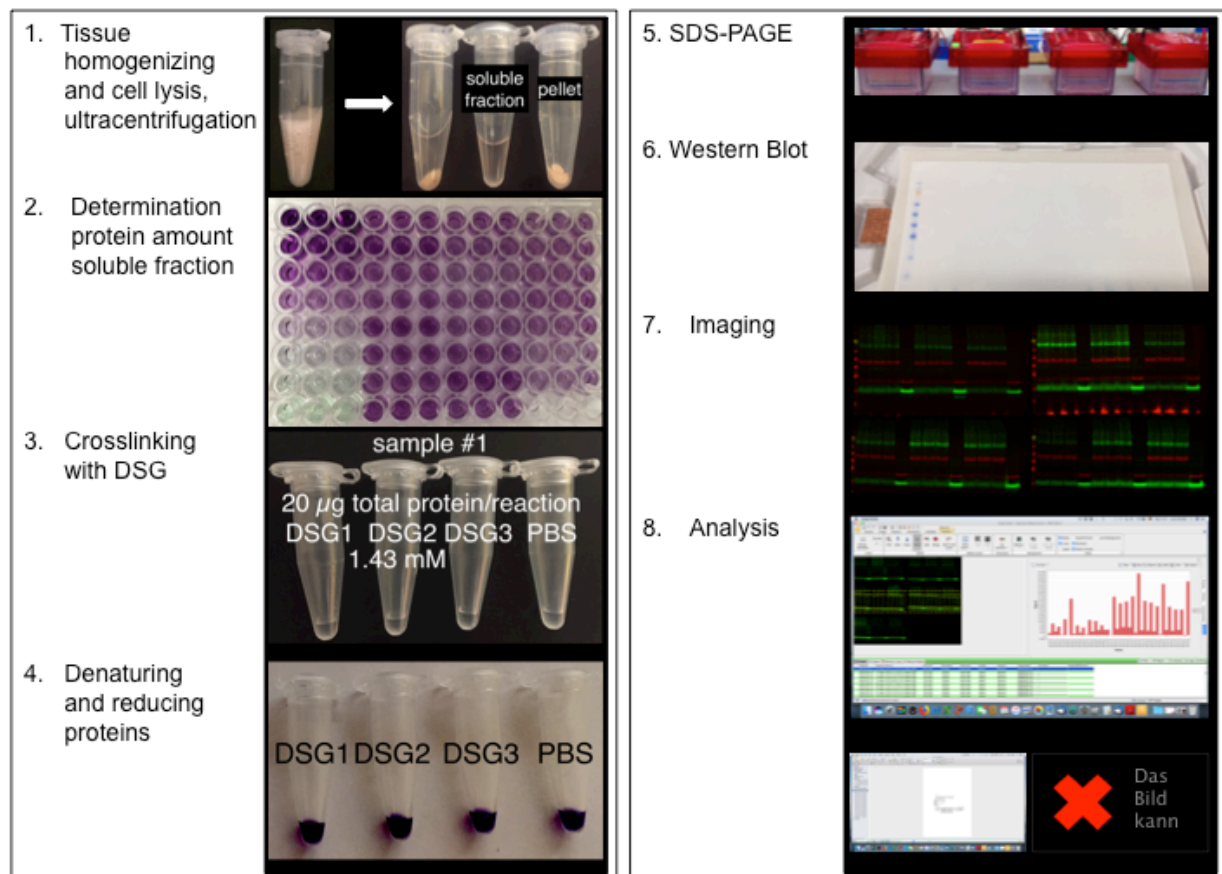

**Supplementary Fig. 1 Protocol and workflow of the crosslinking protocol using tissue and cell lysates. The procedure is described in the Methods section.**

**Fig. S2 Validation of the crosslinking protocol**

**Increasing sonication amplitude [%] decreases  $\alpha S^{CH} / \alpha S^{CU}$  ratio**

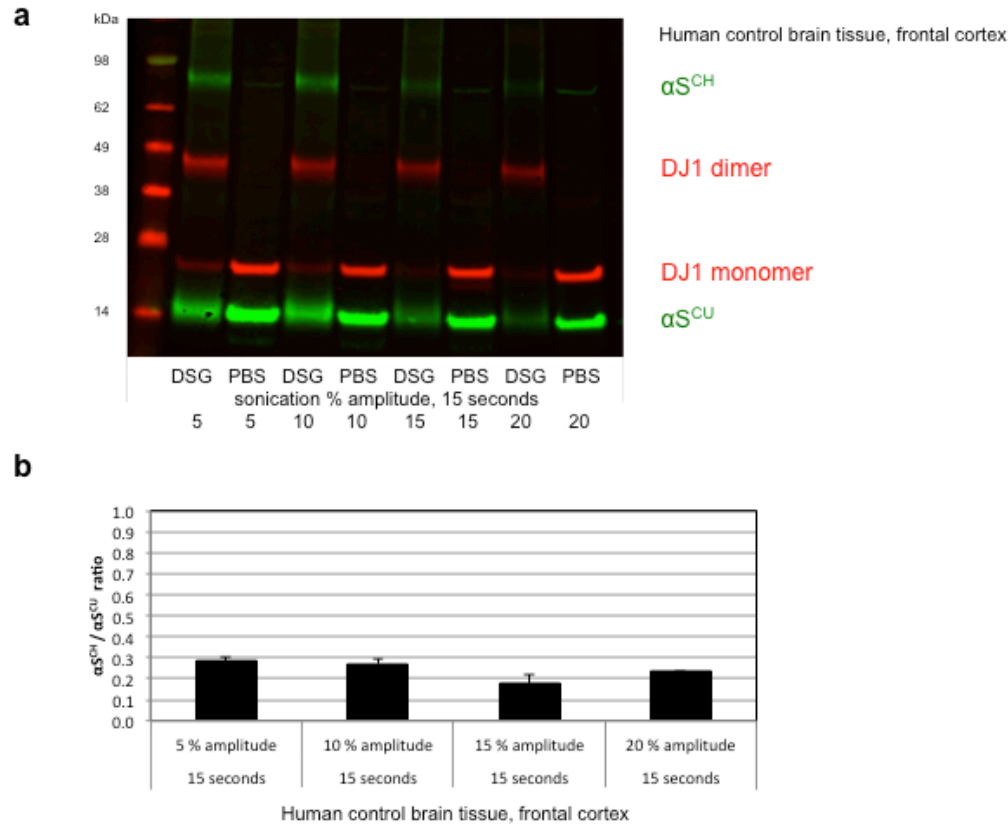

**Supplementary Fig. 2 Validation of the crosslinking protocol.** The procedure is described in the Methods section. **a**, Western blot and **b**, quantification of the Western blot of crosslinked (DSG) human control brain tissue (frontal cortex, n=1) subjected to different sonication amplitudes (Fisher Scientific Model 705 Sonic Dismembrator 5 %, 10 %, 15 %, 20 %). Non-crosslinked samples (PBS) are displayed in A.  $\alpha S^{CH}$  are sensitive to sonication as described previously<sup>1</sup> and sonication settings were chosen accordingly (Sonic Dismembrator model 300 settings 40, 15 seconds, Fisher Scientific Model 705 Sonic Dismembrator 5 % of amplitude 15 seconds). Green =  $\alpha S$ , red = DJ1

**Fig. S3 Validation of the crosslinking protocol**

**Efficient crosslinking reaction at neutral pH**

**a1  $\alpha S^{CH} / \alpha S^{CU}$  ratio**

Human control brain tissue, frontal cortex

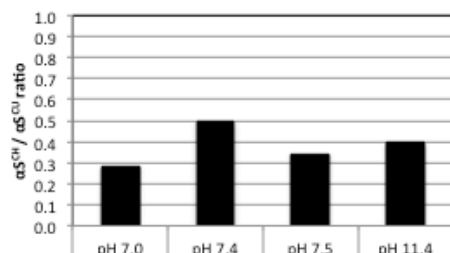

**a2 DJ1 dimer / monomer ratio**

Human control brain tissue, frontal cortex

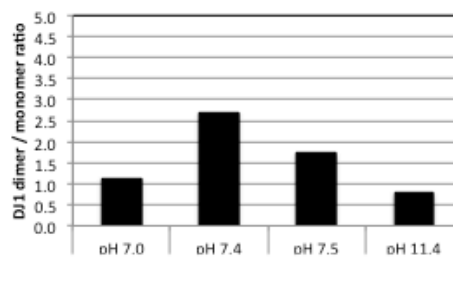

**b Optimal  $\alpha S^{CH}$  detection using 1.4 mM DSG f.c.**

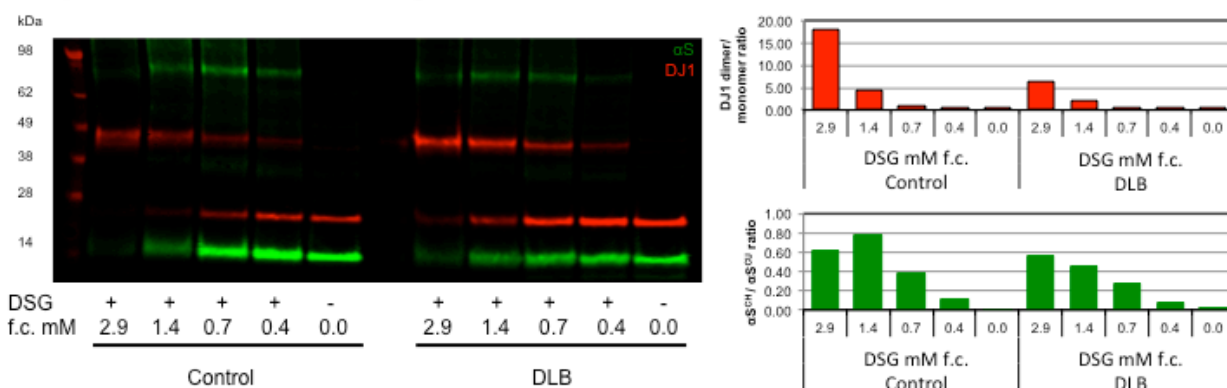

**Supplementary Fig. 3 Validation of the crosslinking protocol.** The procedure is described in the Methods section. **a1**, Quantification of  $\alpha S^{CH} / \alpha S^{CU}$  ratios and **a2**, DJ1 dimer / monomer ratios in human control brain tissue (frontal cortex, n=1) depending on different pH concentrations. 1x PBS has been used at different pH for solubilization of DSG and for filling up the sample volume to 25  $\mu$ l total volume. Efficient crosslinking (controlled by DJ1) is carried out at pH 7.4. **b**, Western blot with quantifications of crosslinked human control and DLB brain tissue (frontal cortex, n=1 each). The crosslinking reaction is depending on the amount and final concentration of the crosslinker DSG as described previously<sup>1</sup>. Thus, for the crosslinking protocol used for frozen brain tissue and cell pellets, a final concentration (f.c.) of 1.4 mM DSG was chosen in accordance with the described optimal 1-2 mM working solution for intact cell crosslinking<sup>1</sup>. DSG “+” = crosslinked sample, DSG “-” = non-crosslinked (control) sample. Green =  $\alpha S$ , red = DJ1



**Fig. S4 Validation of the crosslinking protocol**

**Dependence of crosslinking reaction on total protein amounts**

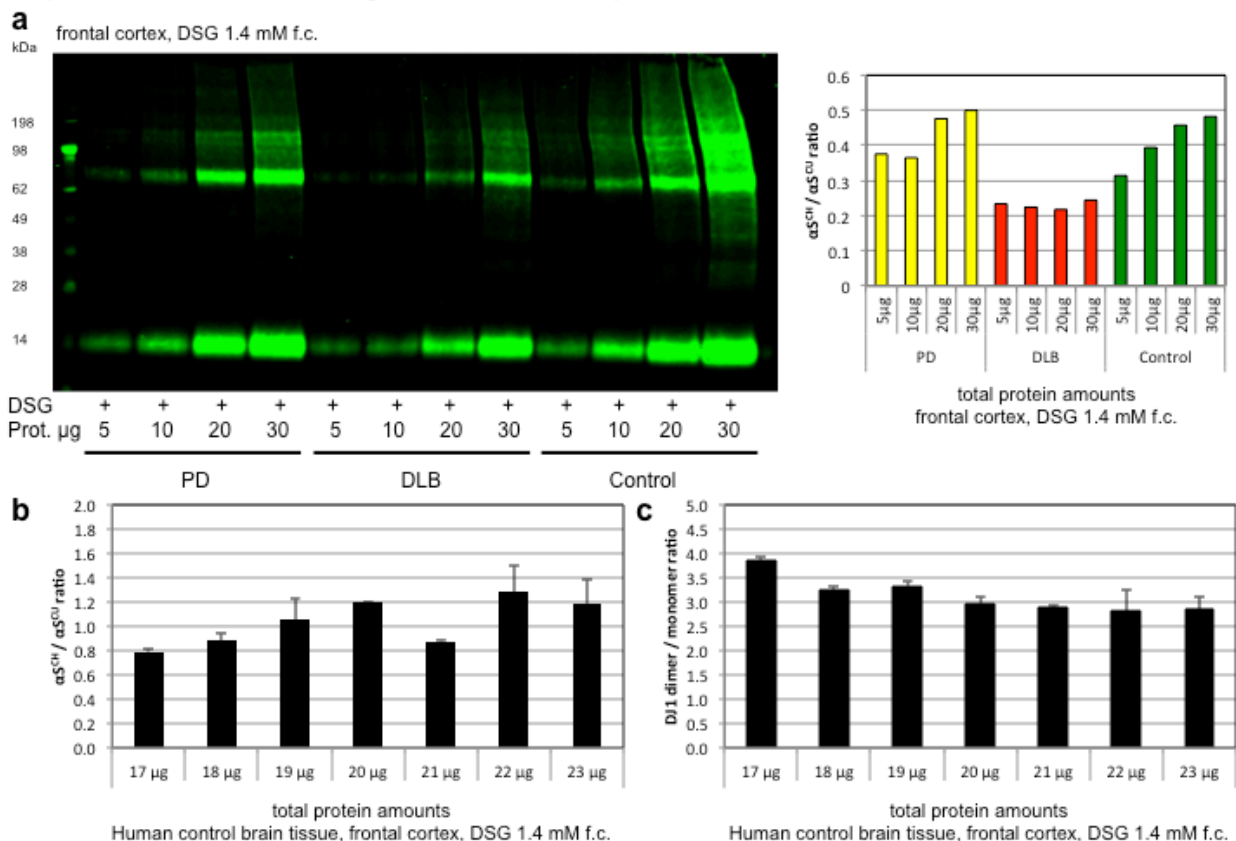

**Supplementary Fig. 4 Validation of the crosslinking protocol.** The procedure is described in the Methods section. **a**, Western blot and quantification demonstrating the efficiency of the crosslinking reaction (human brain tissue: control, DLB, PD (n=1 each), frontal cortex) depending on the total amount of protein input (5  $\mu g$ , 10  $\mu g$ , 20  $\mu g$ , 30  $\mu g$ ) into the reaction and the failure to detect higher amounts of  $\alpha S^{CH}$  in DLB despite a higher total protein input. DSG “+” = crosslinked sample. **b**, **c**, Minor changes in total protein input (17  $\mu g$ , 18  $\mu g$ , 19  $\mu g$ , 20  $\mu g$ , 21  $\mu g$ , 22  $\mu g$ , 23  $\mu g$ ) exhibit very similar crosslinking results and efficiency (controlled by DJ1). Human brain tissue, frontal cortex (n=1). F.c. = final concentration.

**Fig. S5 Validation of the crosslinking protocol and CD spectra of purified  $\alpha$ S**

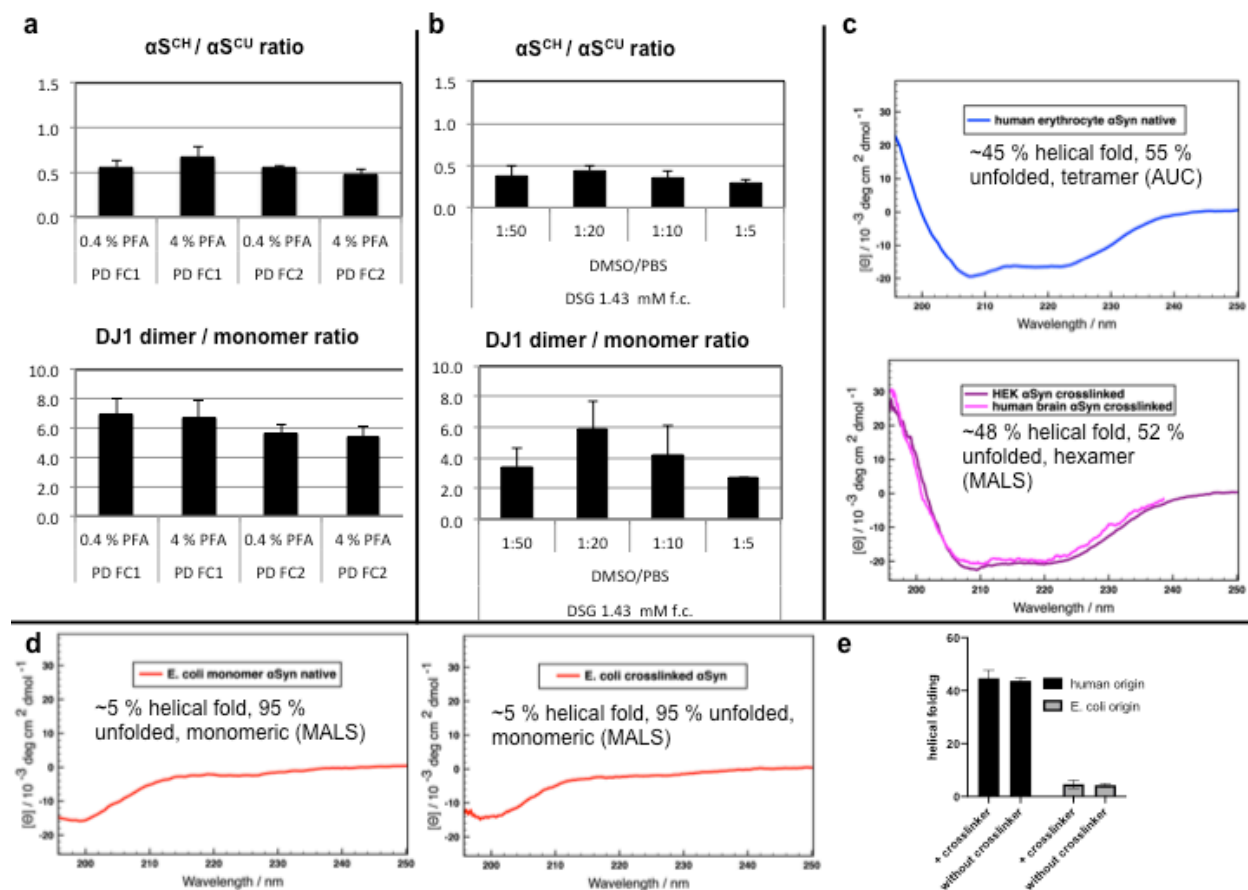

**Supplementary Fig. 5 Validation of the crosslinking protocol and CD spectra of purified  $\alpha$ S.** The procedure is described in the Methods section. **a**, Comparison of different PFA concentrations for the fixation of  $\alpha$ S. Similar  $\alpha S^{CH} / \alpha S^{CU}$  ratios (A) and DJ1 dimer / monomer ratios upon fixation with PFA 0.4 % or PFA 4 %. Brain samples (frontal cortex, FC) have been analyzed in biological duplicates (FC 1 and FC2). **b**, DMSO does not lead to an artificial oligomer formation. DSG was solubilized in different amounts of DMSO and added to a protein lysate from frontal cortex control brain tissue. The crosslinking reaction seems to be most efficient at a DSG PBS/DMSO ratio of 1:20. This ratio is used in the crosslinking protocol. PD = Parkinson's disease, FC = frontal cortex. **c**, Purified  $\alpha S^{CH}$  from red blood cells<sup>2</sup> (RBC) exhibits an  $\alpha$ -helical secondary structure of approximately 45 %. The  $\alpha S^{CH}$  from human brain exhibits an  $\alpha$ -helical secondary structure of approximately 48 %. **d**, Recombinant  $\alpha$ S from E. coli is unfolded. The unfolded structure of recombinant  $\alpha$ S from E. coli remains after crosslinking. **e**, Folded structure of  $\alpha$ S without and with crosslinking demonstrating the difference from human and recombinant origin.

**Fig. S6  $\alpha S^{CH}$  appearance after crosslinking with DSG and DSS**

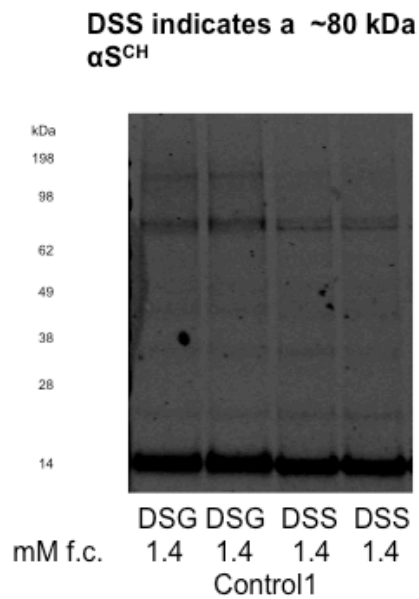

**Supplementary Fig. 6 The crosslinker DSS detects  $\alpha S^{CH}$ .** The procedure for the crosslinking is described in the Methods section. Western blot displaying control (n=1) human brain tissue, frontal cortex, crosslinked (technical duplicates) with either DSG or disuccinimidyl suberate (DSS). DSS detects  $\alpha S^{CH}$  migrating at ~80 kDa in accordance with DSG. All crosslinkers have been used at a final concentration (f.c.) of 1.4 mM in human brain tissue.

**Fig. S7 Immunoprecipitation of  $\alpha$ S from human post-mortem native brain tissue**

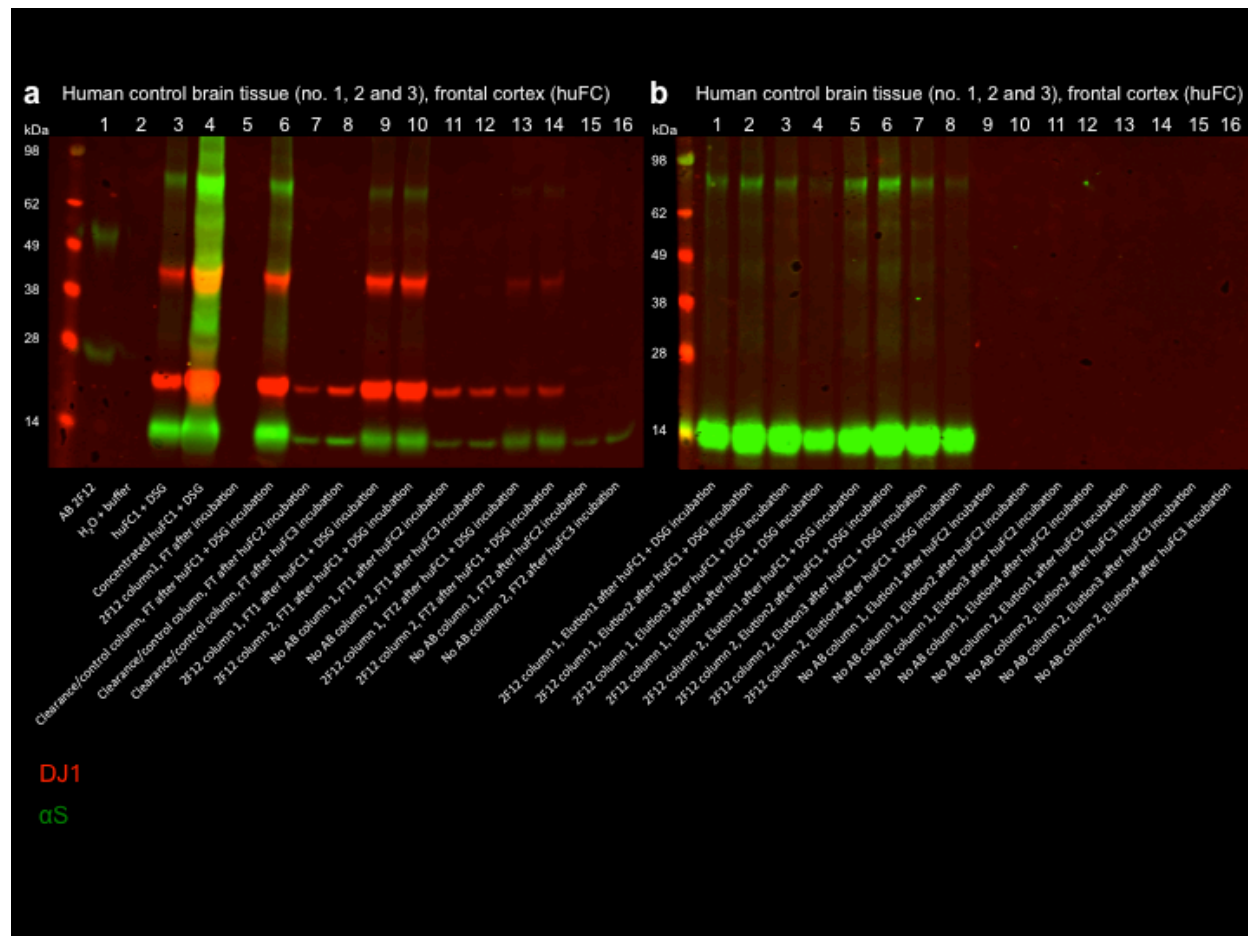

**Supplementary Fig. 7 Immunoprecipitation and purification of  $\alpha$ S from human brain tissue.** The procedure is described in the Methods section. Samples: 3 different human control brain tissues (no. 1, 2, 3), frontal cortex. The crosslinking procedure is performed as described in the Methods section. **a**, Lane 1: Displaying the applied anti- $\alpha$ S 2F12 antibody (25 kDa light and 50 kDa heavy chain). Lane 2: Used 1x conditioning buffer without artificial protein detection. Lane 3: Crosslinked human brain lysate (no. 1) displaying  $\alpha$ S<sup>CH</sup> and  $\alpha$ S<sup>CU</sup> (green) and DJ1 dimer and monomer (red). Lane 4: Concentrated crosslinked human brain lysate (no. 1). Lane 5: Flow through (FT) after clearing of the column (AminoLink Plus™ Coupling Resin) incubated with the 2F12 antibody demonstrating complete binding of the 2F12 antibody. Lane 6: FT after incubation of the crosslinked sample no. 1 on the control/clearance column (Pierce Control Agarose Resin, non-amine reactive). Lane 7: FT after incubation of the non-crosslinked sample no. 2 on the control/clearance column. Lane 8: FT after incubation of the non-crosslinked sample no. 3 on the control/clearance column. Lane 9: FT after incubation of the crosslinked sample no. 1 on the 2F12 antibody column. Column is saturated and some protein lost during the washing step. Lane 10: FT after incubation of the crosslinked sample no. 1 on another 2F12 antibody column. Lane 11: FT of column incubated without any antibody and sample no. 2. Lane 12: FT of column incubated without any antibody and sample no. 3. Lane 13: Second FT after incubation of the crosslinked sample no. 1 on the 2F12 antibody column. Column is saturated and some protein lost during the washing step. Lane 14: Second FT after incubation of the

crosslinked sample no. 1 on another 2F12 antibody column. Lane 15: Second FT of column incubated without any antibody and sample no. 2. Lane 16: Second FT of column incubated without any antibody and sample no. 3. **b**, Lane 1-4: Elution fractions 1-4 of 2F12 column no. 1 incubated with the crosslinked brain sample no 1 showing the purification of the  $\alpha$ S protein (absence of DJ1 protein). Lane 5-8: Elution fractions 1-4 of 2F12 column no. 2 incubated with the crosslinked brain sample no. 1 showing the purification of the  $\alpha$ S protein (absence of DJ1 protein). Lane 9-12: Elution fractions 1-4 of one column without antibody incubated with the non-crosslinked brain sample no 2. No protein binding to the column, no elution of protein in the final elution steps. Lane 13-16: Elution fractions 1-4 of a second column without antibody incubated with the non-crosslinked brain sample no 3. No protein binding to the column, no elution of protein in the final elution steps. **Green** =  $\alpha$ S, **red** = DJ1

**Fig. S8 Immunoprecipitation of  $\alpha$ S from human post-mortem native brain tissue**

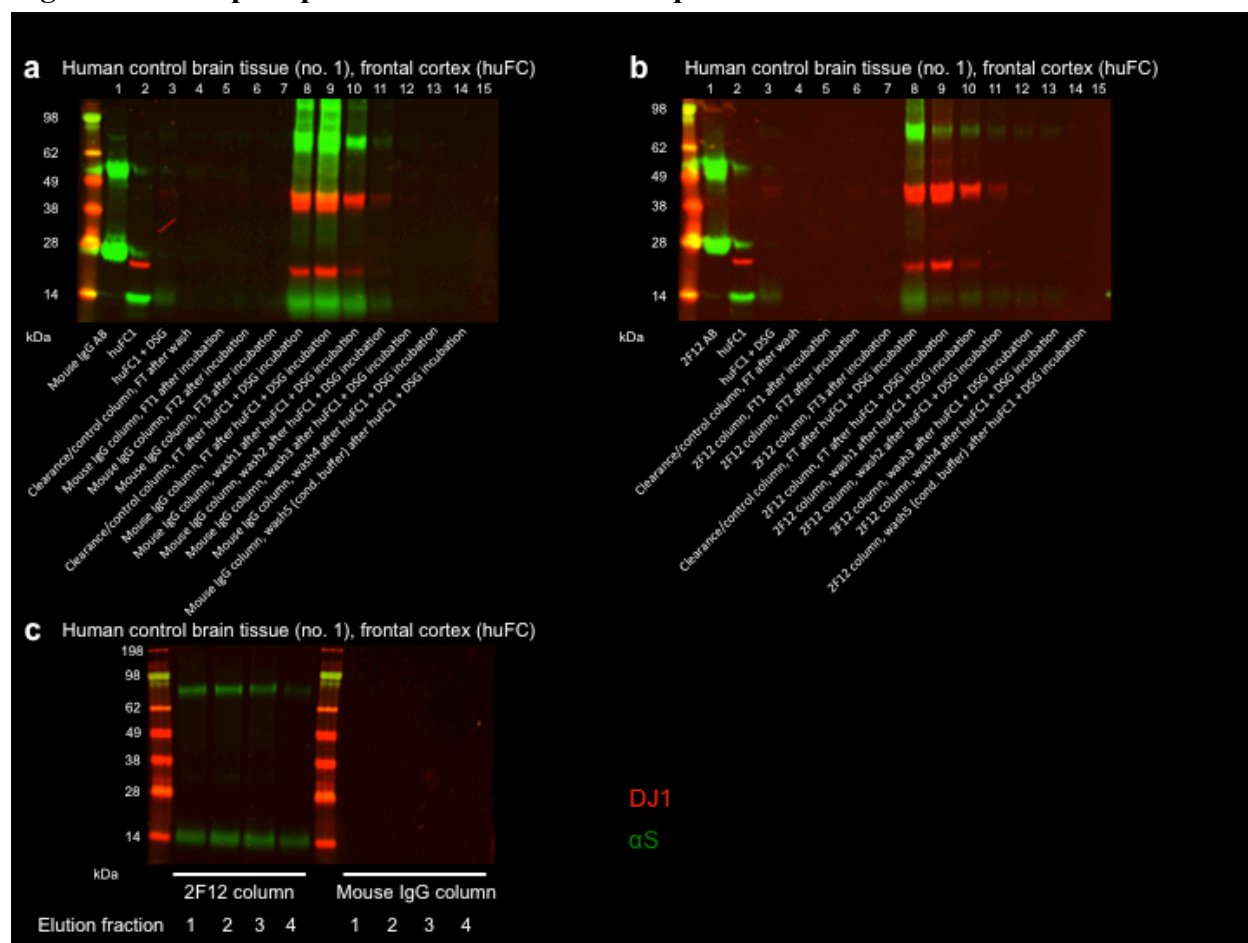

**Supplementary Fig. 8 Immunoprecipitation and purification of  $\alpha$ SYN from human brain tissue.** The procedure is described in the Methods section. Sample: human control brain tissues (no. 1), frontal cortex. The crosslinking is performed according to the procedure described in the Methods section. **a**, Lane 1: Displaying the applied mouse IgG (25 kDa light and 50 kDa heavy chain) used as a control antibody. Lane 2: non-crosslinked lysate human brain tissue no. 1. Slight overflow from Lane 1. Lane 3: Crosslinked lysate human brain tissue no. 1. Lane 4: Flow Through (FT) of the washed clearance/control column (Pierce Control Agarose Resin, non-amine reactive); no protein detection. Lane 5-8: FTs after incubation of the antibody column (AminoLink Plus™ Coupling Resin) with the mouse IgG demonstrating complete binding of the mouse IgG. Lane 8: FT after incubation of the clearance/control column with the crosslinked human brain lysate no. 1. Lane 9: FT after incubation of the mouse IgG antibody column with the crosslinked human brain lysate no. 1. Lane 10-15: FT after the washing steps of the mouse IgG antibody column incubated with the crosslinked human brain lysate no. 1. **b**, Lane 1: Displaying the applied anti- $\alpha$ S antibody (25 kDa light and 50 kDa heavy chain). Lane 2: Non-crosslinked lysate human brain tissue no. 1. Slight overflow from lane 1. Lane 3: Crosslinked lysate human brain tissue no. 1. Lane 4: Flow Through (FT) of the washed clearance/control column Pierce Control Agarose Resin, non-amine reactive); no protein detection. Lane 5-8: FTs after incubation of the antibody column (AminoLink Plus™ Coupling Resin) with the 2F12

antibody demonstrating complete binding of the 2F12. Lane 8: FT after incubation of the clearance/control column with the crosslinked human brain lysate no. 1. Lane 9: FT after incubation of the 2F12 antibody column with the crosslinked human brain lysate no. 1. Column is saturated, no complete binding of the crosslinked lysate Lane 10-15: FT after the washing steps of the 2F12 antibody column incubated with the crosslinked human brain lysate no. 1. c, Lane 1-4 2F12 column: Elution fractions 1-4 of 2F12 column incubated with the crosslinked brain sample no 1 showing the purification of the  $\alpha$ S protein (absence of DJ1 protein). Lane 1-4 mouse IgG column: Elution fractions 1-4 of mouse IgG column incubated with the crosslinked brain sample no 1 showing no binding and accordingly no elution of  $\alpha$ SYN protein or DJ1.  
Green =  $\alpha$ S, red = DJ1

**Fig. S9 Separation of  $\alpha S^{CH}$  /  $\alpha S^{CU}$  from human control brain tissue**

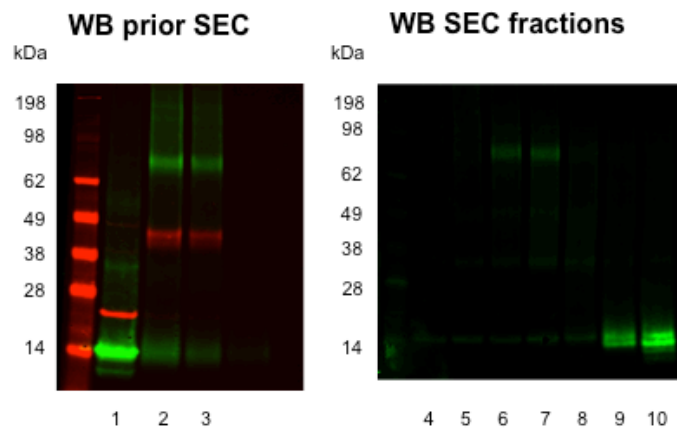

**Supplementary Fig. 9 Separation of immunoprecipitated  $\alpha S$  via SEC.** The procedure is described in the Methods section. Western blot of human control brain tissue, frontal cortex. Lane 1: Non-crosslinked lysate. Lane 2: Crosslinked lysate. Lane 3: Concentrated sample after immunoprecipitation. Lane 4-10: SEC fractions 4-10 displaying separated  $\alpha S^{CH}$  in fraction 6 + 7 and  $\alpha S^{CU}$  in fraction 9 + 10



**Fig. S10 Absent co-purification of  $\beta$ -Actin or DJ1 and  $\alpha$ S<sup>CH</sup>**

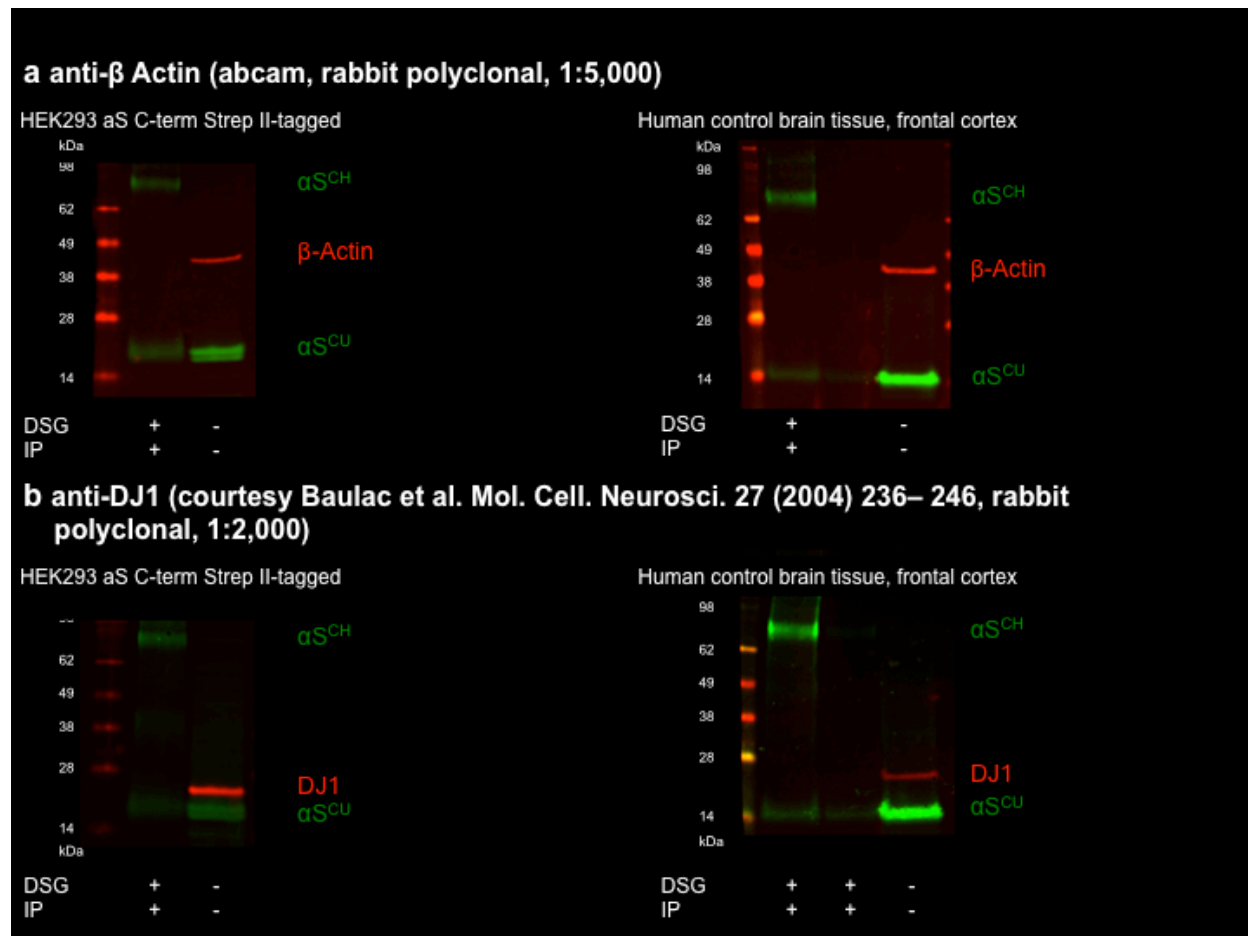

**Supplementary Fig. 10 No co-purification of  $\beta$ -Actin or DJ1 and  $\alpha$ S<sup>CH</sup>.** The crosslinking and immunoprecipitation procedures are described in the Methods section. Samples: HEK cells and human control brain tissue, frontal cortex. HEK293  $\alpha$ S C-term Strep II-tagged lysates were crosslinked and used to purify  $\alpha$ S<sup>CH</sup> and  $\alpha$ S<sup>CU</sup> using StrepTrap 5ml columns. The  $\alpha$ S<sup>CH</sup> and  $\alpha$ S<sup>CU</sup> from human brain lysate was immunoprecipitated after crosslinking using the Pierce™ Direct IP Kit. **a**, Western blot of immunoprecipitated and crosslinked protein lysate from HEK cells and human brain in comparison to the original lysates demonstrating no co-immunoprecipitation of the  $\beta$ -Actin protein and  $\alpha$ S<sup>CH</sup>. **b**, Western blot of immunoprecipitated and crosslinked protein lysate from HEK cells and human brain in comparison to the original lysates demonstrating no co-immunoprecipitation of the DJ1 protein and  $\alpha$ S<sup>CH</sup>. The immunoprecipitated human brain sample has been concentrated using an Amicon ultra 50 kDa filter unit and the first lane depicts the concentrated sample, second lane depicts the flow through. DSG “+” = crosslinked sample. DSG “-” = non-crosslinked (control) sample. IP “+” = immunoprecipitated sample, IP “-” = no immunoprecipitation performed.

**Fig. S11 Absent co-purification of HSP70 or 14-3-3 and  $\alpha S^{CH}$**

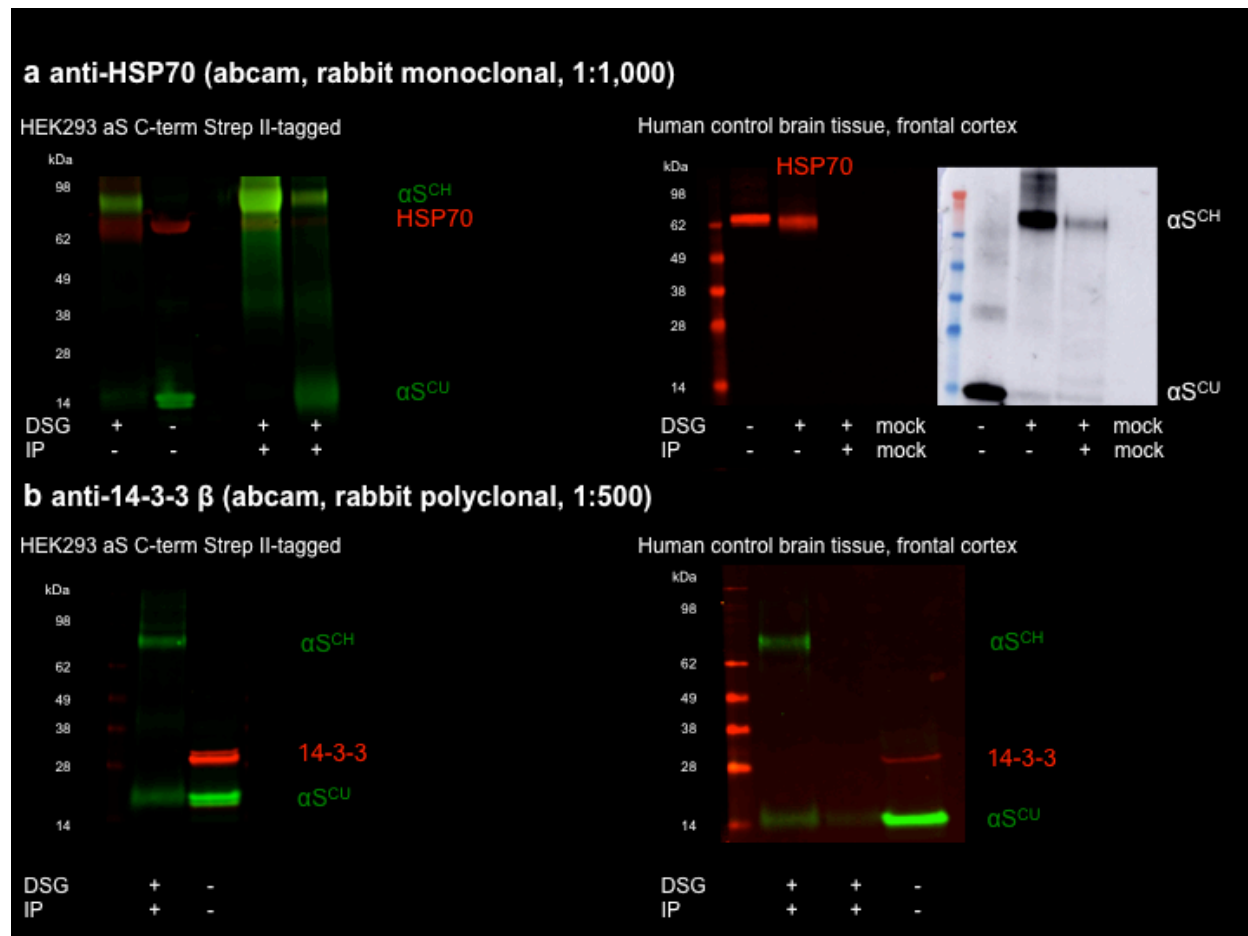

**Supplementary Fig. 11 No co-purification of HSP70 or 14-3-3 and  $\alpha S^{CH}$ .** The crosslinking and immunoprecipitation procedures are described in the Methods section. Samples: HEK cells and human control brain tissue, frontal cortex. HEK293  $\alpha S$  C-term Strep II-tagged lysates were crosslinked and used to purify  $\alpha S^{CH}$  and  $\alpha S^{CU}$  using StrepTrap 5ml columns. The  $\alpha S^{CH}$  and  $\alpha S^{CU}$  from human brain lysate was immunoprecipitated after crosslinking using the Pierce™ Direct IP Kit. **a**, Western blot of immunoprecipitated and crosslinked protein lysate from HEK cells and human brain in comparison to the original lysates and one mock IP sample (human brain, no antibody for capturing used). HEK: First lane depicts the crosslinked original lysate, second lane depicts the non-crosslinked original lysate, third and fourth lane depict the  $\alpha S$  after crosslinking, immunoprecipitation and SEC to separate  $\alpha S^{CH}$  and  $\alpha S^{CU}$ . IP human brain samples have been concentrated using Amicon ultra 50 kDa filter units. The Western blots demonstrate no co-immunoprecipitation of HSP70 protein (left) and  $\alpha S^{CH}$  (right). **b**, Western blot of immunoprecipitated and crosslinked protein lysate from HEK cells and human brain in comparison to the original lysates demonstrating no co-immunoprecipitation of 14-3-3 protein and  $\alpha S^{CH}$ . The immunoprecipitated human brain sample has been concentrated using an Amicon ultra 50 kDa filter unit and the first lane depicts the concentrated sample, second lane depicts the flow through. DSG “+” = crosslinked sample. DSG “-” = non-crosslinked (control) sample. IP “+” = immunoprecipitated sample, IP “-” = no immunoprecipitation performed.

**Fig. S12 Absent co-purification of  $\beta$ -Tubulin III or Tau and  $\alpha S^{CH}$**

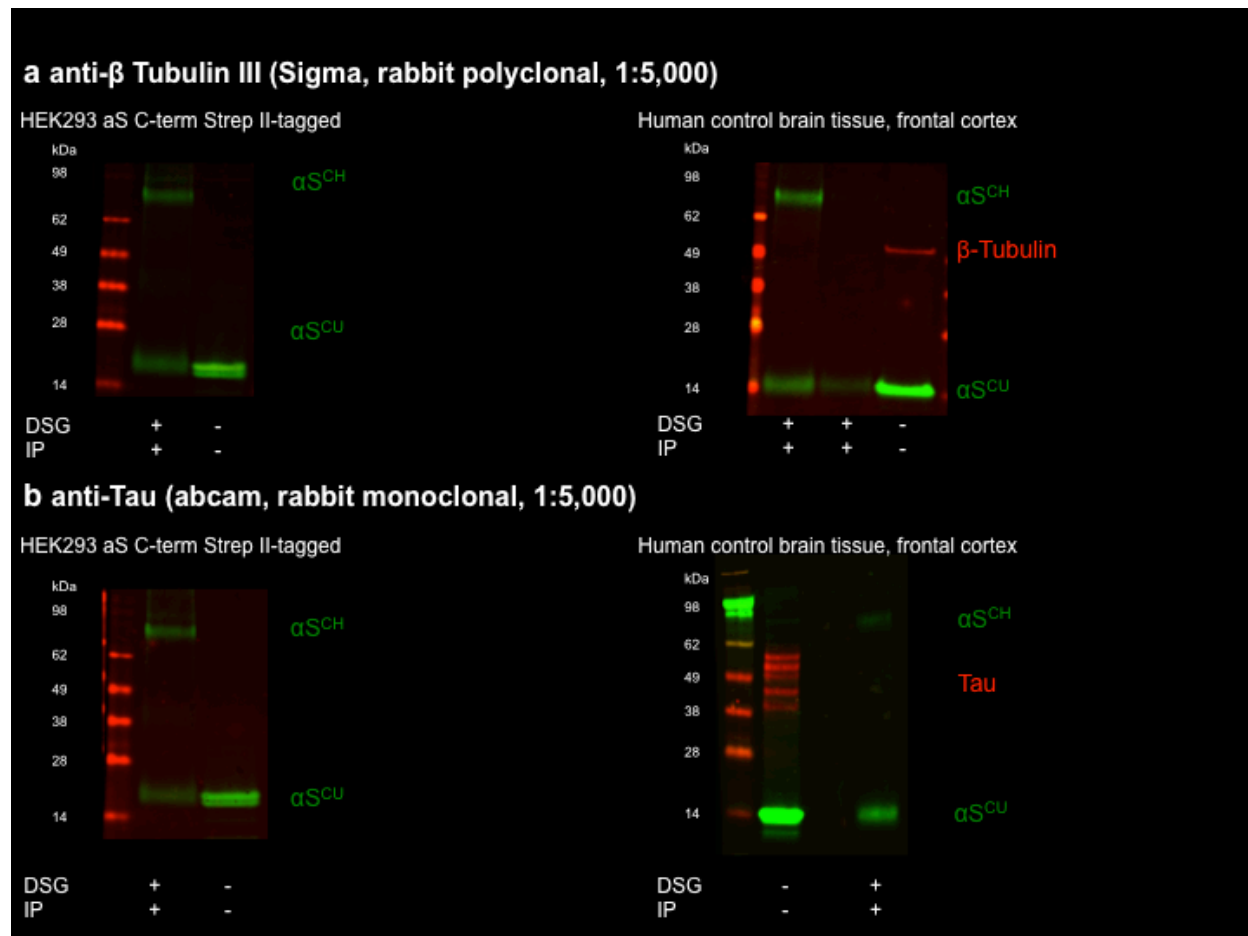

**Supplementary Fig. 12 No co-purification of  $\beta$ -Tubulin or Tau and  $\alpha S^{CH}$ .** The crosslinking and immunoprecipitation procedures are described in the Methods section. Samples: HEK cells and human control brain tissue, frontal cortex. HEK293  $\alpha S$  C-term Strep II-tagged lysates were crosslinked and used to purify  $\alpha S^{CH}$  and  $\alpha S^{CU}$  using StrepTrap 5ml columns. The  $\alpha S^{CH}$  and  $\alpha S^{CU}$  from human brain lysate was immunoprecipitated after crosslinking using the Pierce™ Direct IP Kit. **a**, Western blot of immunoprecipitated and crosslinked protein lysate from HEK cells and human brain in comparison to the original lysates demonstrating no co-immunoprecipitation of  $\beta$ -Tubulin protein and  $\alpha S^{CH}$  in the brain sample. The immunoprecipitated human brain sample has been concentrated using an Amicon ultra 50 kDa filter unit and the first lane depicts the concentrated sample, second lane depicts the flow through.  $\beta$  Tubulin could not be demonstrated in the original lysate and immunoprecipitated sample of HEK cells. **b**, Western blot of immunoprecipitated and crosslinked protein lysate from HEK cells and human brain in comparison to the original lysates demonstrating no co-immunoprecipitation of tau protein and  $\alpha S^{CH}$  in the human brain sample. Tau could not be demonstrated in the original lysate and immunoprecipitated sample of HEK cells. DSG “+” = crosslinked sample. DSG “-” = non-crosslinked (control) sample. IP “+” = immunoprecipitated sample, IP “-” = no immunoprecipitation performed.

**Fig. S13 Absent co-purification of HSP90 and  $\alpha S^{CH}$**

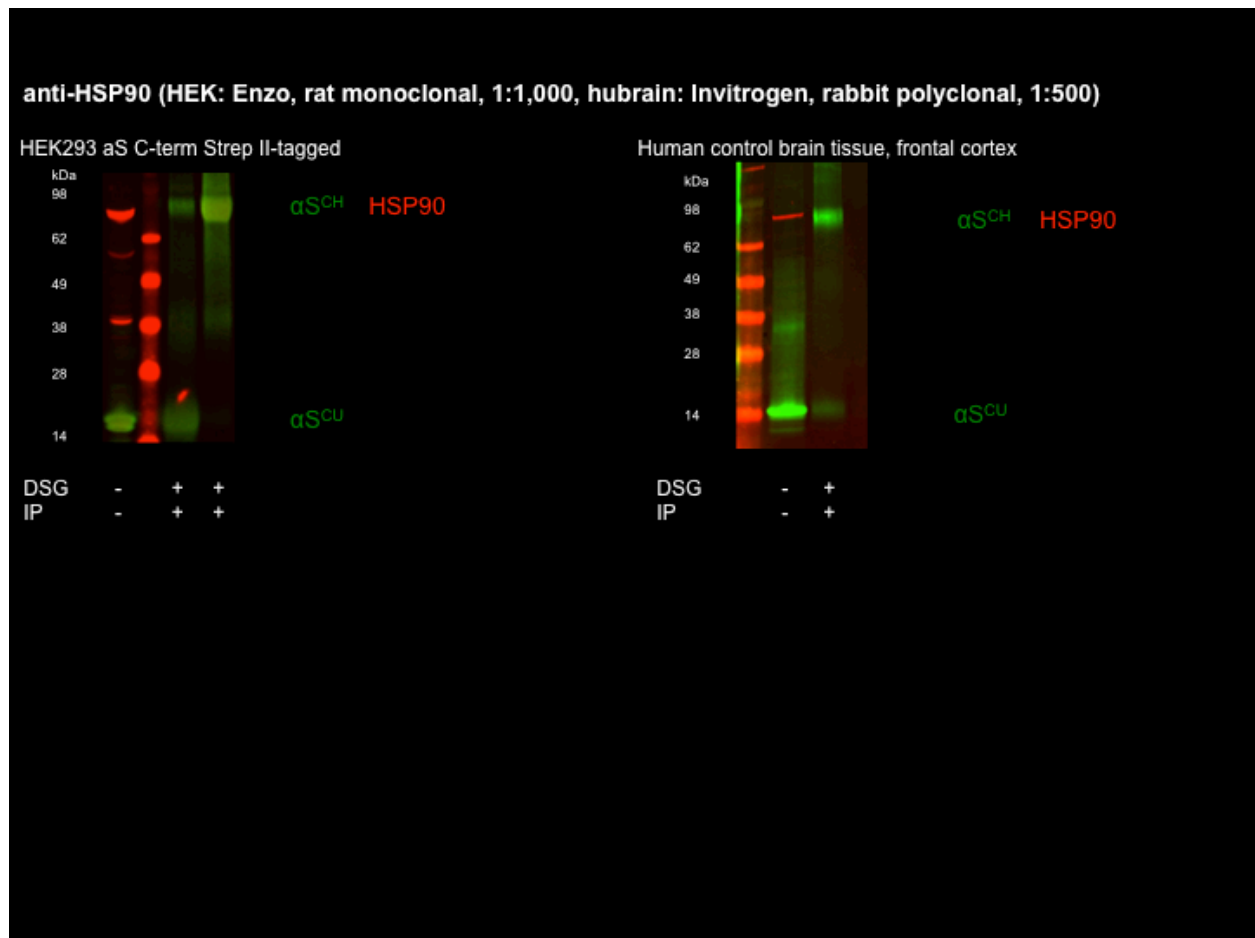

**Supplementary Fig. 13 No co-purification of HSP90 and  $\alpha S^{CH}$ .** The crosslinking and immunoprecipitation procedures are described in the Methods section. Samples: HEK cells and human control brain tissue, frontal cortex. HEK293  $\alpha S$  C-term Strep II-tagged lysates were crosslinked and used to purify  $\alpha S^{CH}$  and  $\alpha S^{CU}$  using StrepTrap 5ml columns. The  $\alpha S^{CH}$  and  $\alpha S^{CU}$  from human brain lysate was immunoprecipitated after crosslinking using the Pierce Pierce™ Direct IP Kit. Western blot of immunoprecipitated and crosslinked protein lysate from HEK cells and human brain in comparison to the original lysates demonstrating no co-immunoprecipitation of HSP90 protein and  $\alpha S^{CH}$ . HEK: First lane depicts the non-crosslinked original lysate, second lane and third lane depict the  $\alpha S$  after crosslinking, immunoprecipitation and SEC to separate  $\alpha S^{CH}$  and  $\alpha S^{CU}$ . DSG “+” = crosslinked sample. DSG “-” = non-crosslinked (control) sample. IP “+” = immunoprecipitated sample, IP “-” = no immunoprecipitation performed.

Fig. S14  $\alpha S^{CH}$  exhibits a mass of 86 kDa

MALS

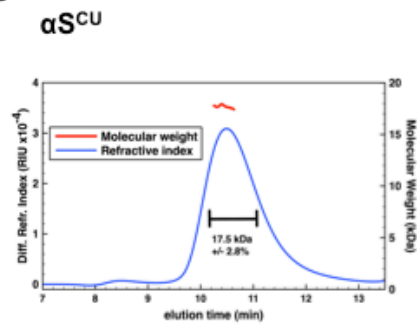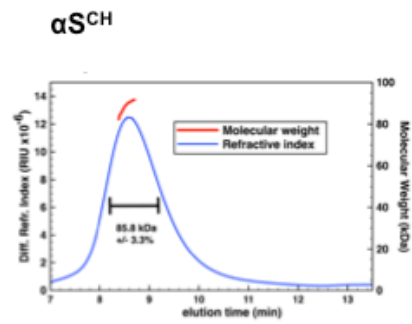

**Supplementary Fig. 14  $\alpha S^{CH}$  exhibits a mass of 86 kDa.** Immunoprecipitated  $\alpha S^{CH}$  from frontal cortex tissue of a control was separated from  $\alpha S^{CU}$  by size-exclusion chromatography and analyzed via multi-angle light scattering demonstrating a mass of approximately 86 kDa.

Fig. S15 Compendium of sample information

a Coverage of available data

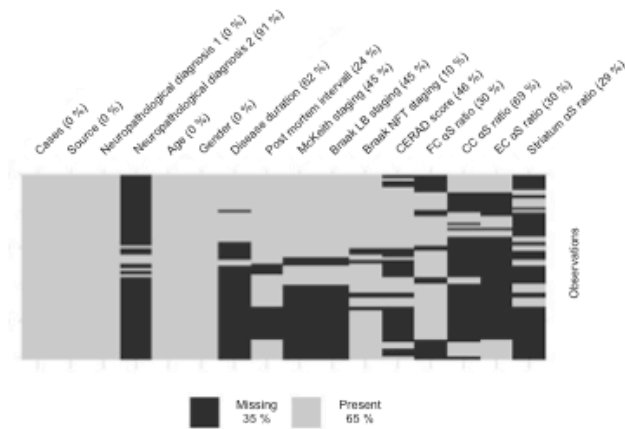

b Exemplary Lewy body pathology

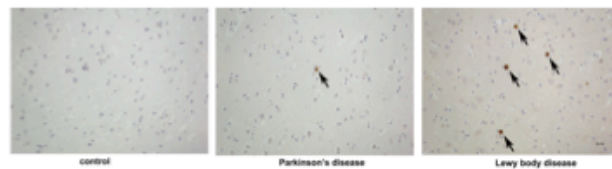

c Details on samples

|                   |        |                                |        |
|-------------------|--------|--------------------------------|--------|
| <b>PMI [hrs.]</b> |        | <b>Braak LB</b>                |        |
| Min.              | :5.00  | Min.                           | :3.000 |
| 1st Qu.           | :23.75 | 1st Qu.                        | :6.000 |
| Median            | :38.50 | Median                         | :6.000 |
| Mean              | :41.77 | Mean                           | :5.594 |
| 3rd Qu.           | :54.25 | 3rd Qu.                        | :6.000 |
| Max.              | :99.00 | Max.                           | :6.000 |
| NA's              | :15    | NA's                           | :31    |
| <b>Braak NFT</b>  |        | <b>Disease duration [yrs.]</b> |        |
| Min.              | :0.000 | Min.                           | :3.00  |
| 1st Qu.           | :2.000 | 1st Qu.                        | :5.75  |
| Median            | :2.000 | Median                         | :8.00  |
| Mean              | :2.667 | Mean                           | :8.75  |
| 3rd Qu.           | :3.000 | 3rd Qu.                        | :10.25 |
| Max.              | :6.000 | Max.                           | :22.00 |
| NA's              | :6     | NA's                           | :39    |
| <b>CERAD</b>      |        | <b>Age [yrs.]</b>              |        |
| NA's              | :29    | Min.                           | :42.00 |
| Frequent          | :1     | 1st Qu.                        | :73.00 |
| mild              | :2     | Median                         | :79.00 |
| Moderate          | :9     | Mean                           | :77.52 |
| none              | :15    | 3rd Qu.                        | :85.00 |
| sparse            | :7     | Max.                           | :99.00 |
| <b>NPDx1</b>      |        | <b>McKeith</b>                 |        |
| Control           | :28    | NA's                           | :31    |
| DLB               | :22    | brainstem                      | :5     |
| PD                | :13    | Neocortical                    | :27    |
| <b>NPDx2</b>      |        | <b>Gender</b>                  |        |
| NA's              | :57    | Female                         | :24    |
| AD                | :6     | Male                           | :39    |

**Supplementary Fig. 15 Summary of the clinical and neuropathological data of the analyzed human brain samples.** **a**, Coverage (availability) of the clinical and neuropathological data. LB = Lewy body, NFT = neurofibrillary tangles, CERAD = Consortium to Establish a Registry for Alzheimer's Disease, FC = frontal cortex, CC = cingulate cortex, EC = entorhinal cortex. **b**, Details of clinical and neuropathological features. **c**, Representative immunohistochemical pictures of Lewy body pathology of one control, PD and DLB case.

**Fig. S16 Exemplary Western blot of analyzed samples**

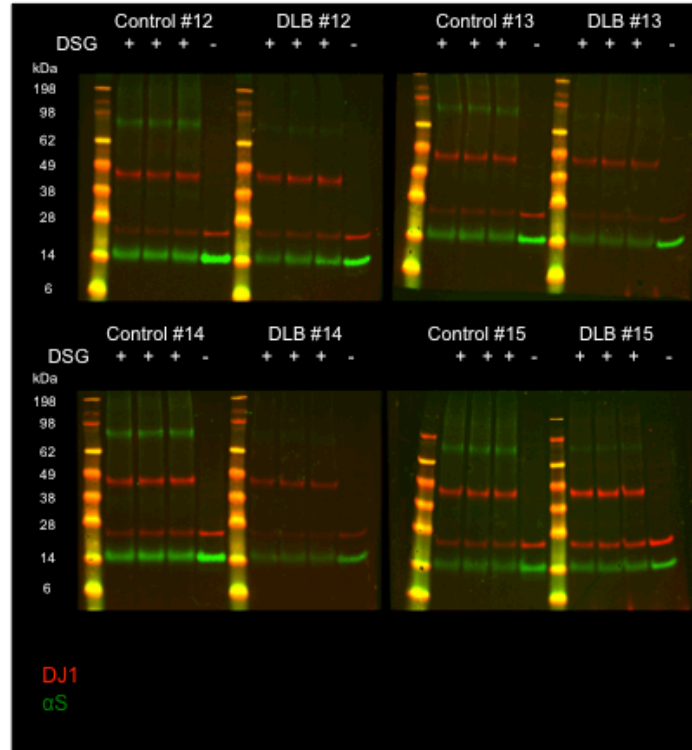

**Supplementary Fig. 16 Western blot example of reduced  $\alpha S^{CH}$  in 4 DLB patients.** Western blot of crosslinked frontal cortex (FC) lysate (control vs. DLB, frontal cortex, n=4 each). The crosslinking reaction was performed in technical triplicates alongside with one non-crosslinked (PBS) sample. The Western blot demonstrates reduced  $\alpha S^{CH} / \alpha S^{CU}$  ratios in DLB patients compared to controls. DSG “+” = crosslinked sample. DSG “-” = non-crosslinked sample. **Green** =  $\alpha S$ , **red** = DJ1

**Fig. S17 Similar DJ1 dimer to monomer ratios across all brain regions**

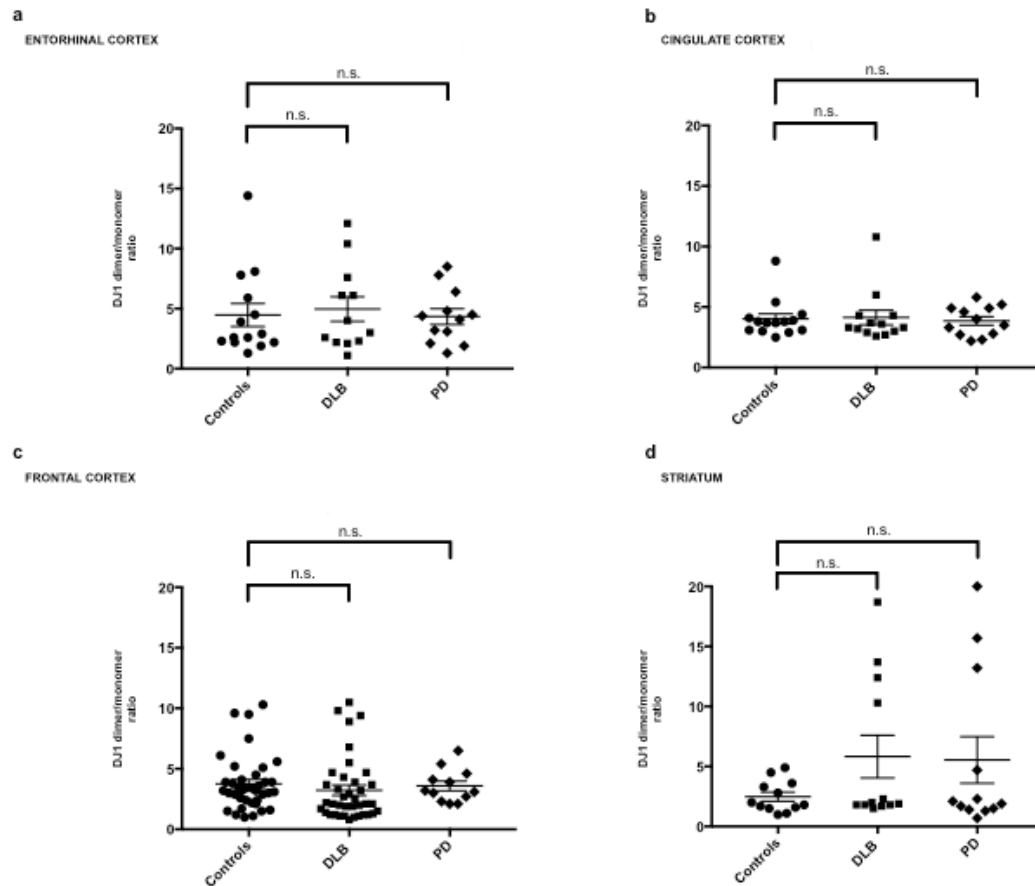

**Supplementary Fig. 17 Similar DJ1 dimer to monomer ratios across all brain regions.** The DJ1 serves as an internal control for the crosslinking procedure. Across different brain regions (**a**, entorhinal cortex, **b**, cingulate cortex, **c**, frontal cortex, **d**, striatum) no differences in DJ1 dimer to monomer ratios were detected comparing controls, DLB patients and PD patients. Entorhinal cortex controls n=7 individuals, DLB n=6 individuals, PD n=6 individuals. Cingulate cortex controls n=5 individuals, DLB n=7 individuals, PD n=6 individuals. Frontal cortex controls n=19 individuals, DLB n=19 individuals, PD n=6 individuals. Striatum controls n=6 individuals, DLB n=6 individuals, PD n=6 individuals. Samples have been analyzed in biological duplicates and technical triplicates except for one cingulate cortex sample of one DLB individual (low amount of tissue). N.s.=not significant.



**Fig. S18 No significant correlation of  $\alpha S^{CH} / \alpha S^{CU}$  ratios and Lewy body (LB) pathology in the entorhinal cortex or striatum**

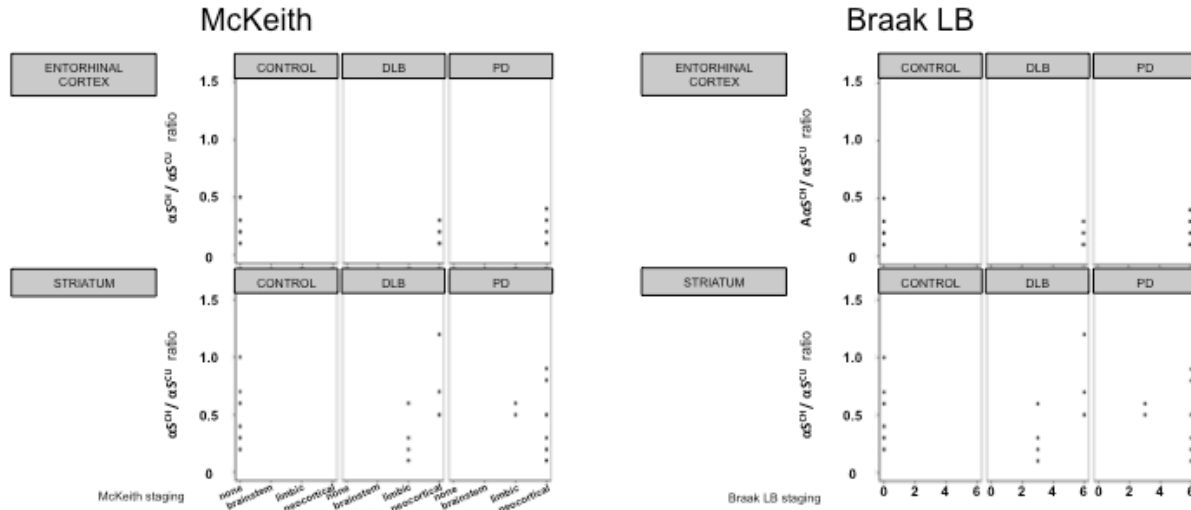

**Supplementary Fig. 18 No significant correlation of  $\alpha S^{CH} / \alpha S^{CU}$  ratios and McKeith or Braak Lewy body (LB) pathology in the entorhinal cortex or striatum.** Across the entorhinal cortex (EC) and striatum no significant correlation of  $\alpha S^{CH} / \alpha S^{CU}$  ratios and McKeith (none, brainstem, limbic, neocortical) or Braak LB staging (0, 1, 2, 3, 4, 5, 6) was detected comparing controls to DLB patients and PD patients. EC  $\alpha S^{CH} / \alpha S^{CU}$  ratios vs. McKeith staging  $r = -0.2$ ,  $R^2 = 0.04$ ,  $p = 0.2$ ,  $n$  pairs = 38. EC  $\alpha S^{CH} / \alpha S^{CU}$  vs. Braak LB staging  $r = -0.2$ ,  $R^2 = 0.05$ ,  $p = 0.2$ ,  $n$  pairs = 38. Striatum  $\alpha S^{CH} / \alpha S^{CU}$  vs. McKeith staging  $r = 0.09$ ,  $R^2 = 0.009$ ,  $p = 0.6$ ,  $n$  pairs = 32. Striatum  $\alpha S^{CH} / \alpha S^{CU}$  ratios vs. Braak LB staging  $r = 0.09$ ,  $R^2 = 0.009$ ,  $p = 0.6$ ,  $n$  pairs = 32.

**Fig. S19 Significant correlation of  $\alpha S^{CH} / \alpha S^{CU}$  ratios and disease duration of the entorhinal cortex but not frontal cortex, cingulate cortex or striatum**

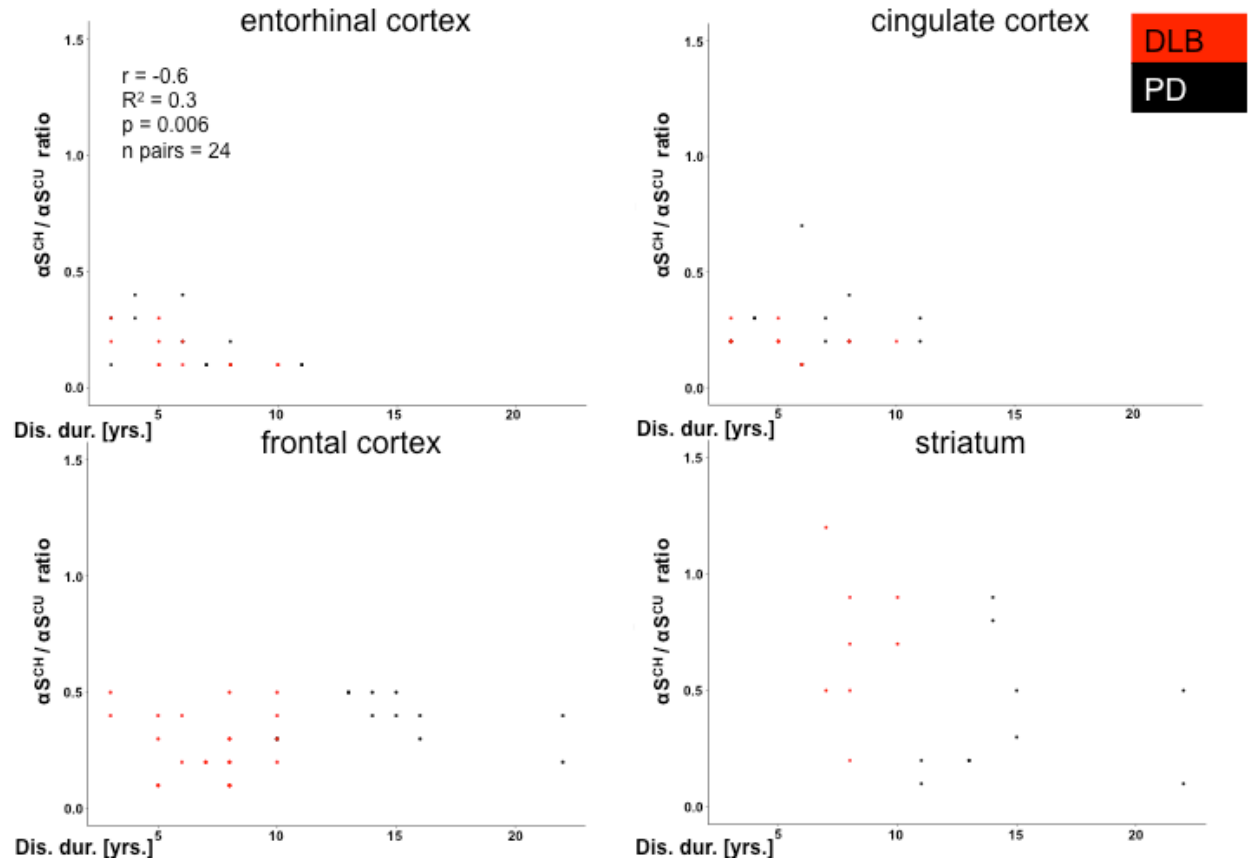

**Supplementary Fig. 19 Significant negative correlation of  $\alpha S^{CH} / \alpha S^{CU}$  ratios and disease duration in the entorhinal cortex.** In the entorhinal cortex (EC) significant negative correlation of  $\alpha S^{CH} / \alpha S^{CU}$  ratios and disease duration was detected comparing controls to DLB patients and PD patients. EC  $\alpha S^{CH} / \alpha S^{CU}$  ratios vs. disease duration  $r = -0.6$ ,  $R^2 = 0.3$ ,  $p = 0.006$ ,  $n \text{ pairs} = 24$ . No correlation could be found in the cingulate cortex (CC), frontal cortex (FC) or striatum between  $\alpha S^{CH} / \alpha S^{CU}$  ratios and disease duration comparing controls to DLB patients and PD patients. CC  $\alpha S^{CH} / \alpha S^{CU}$  ratios vs. disease duration  $r = 0.04$ ,  $R^2 = 0.001$ ,  $p = 0.9$ ,  $n \text{ pairs} = 25$ . FC  $\alpha S^{CH} / \alpha S^{CU}$  ratios vs. disease duration  $r = 0.3$ ,  $R^2 = 0.07$ ,  $p = 0.1$ ,  $n \text{ pairs} = 34$ . Striatum  $\alpha S^{CH} / \alpha S^{CU}$  ratios vs. disease duration  $r = -0.4$ ,  $R^2 = 0.1$ ,  $p = 0.2$ ,  $n \text{ pairs} = 18$ . Dis. dur. = Disease duration.

**Fig. S20 No significant correlation of  $\alpha S^{CH} / \alpha S^{CU}$  ratios and PMI interval**

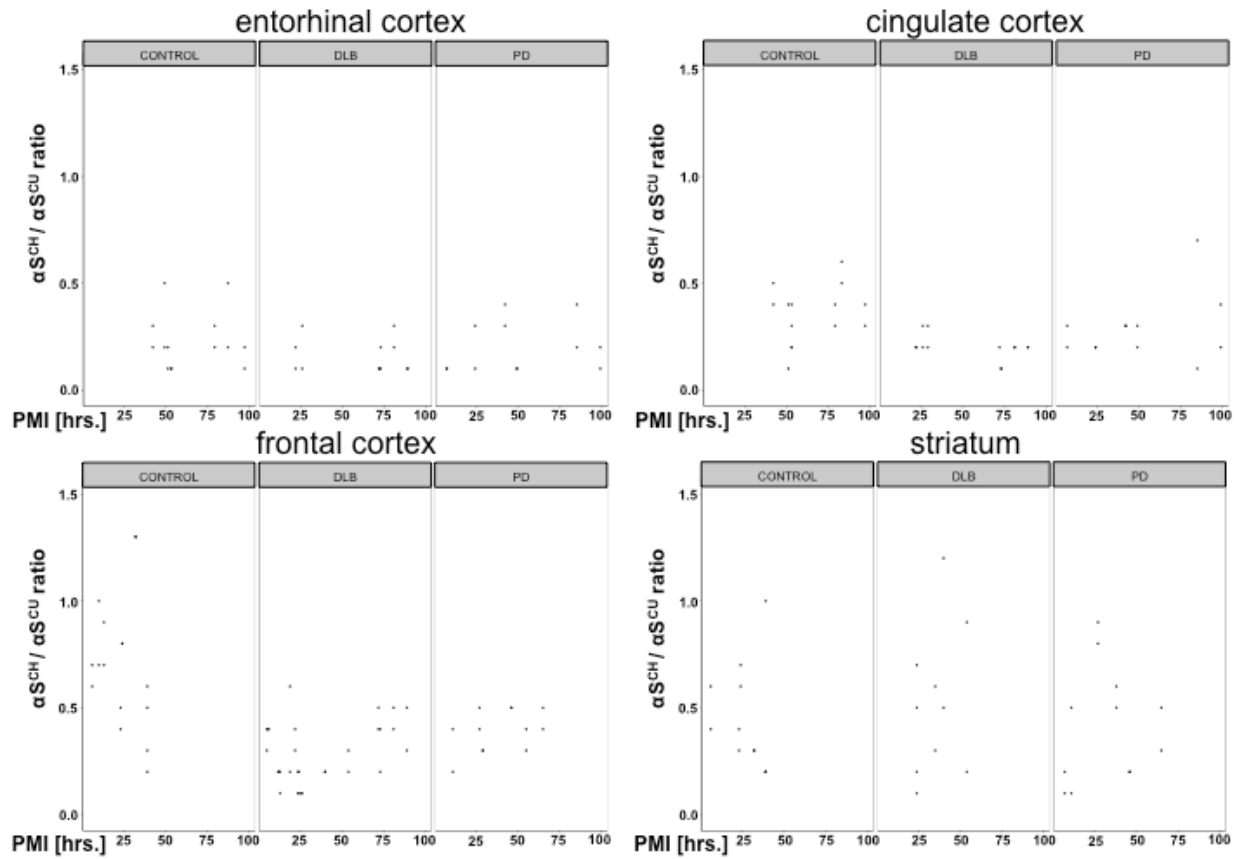

**Supplementary Fig. 20 No significant correlation of  $\alpha S^{CH} / \alpha S^{CU}$  ratios and post mortem interval (PMI).** Across different brain regions (entorhinal cortex (EC), cingulate cortex (CC), frontal cortex (FC) and striatum) no correlation of  $\alpha S^{CH} / \alpha S^{CU}$  ratios and PMI interval (hrs. = hours) was detected comparing controls to DLB patients and PD patients. EC  $\alpha S^{CH} / \alpha S^{CU}$  vs. PMI  $r = 0.07$ ,  $R^2 = 0.005$ ,  $p = 0.7$ ,  $n$  pairs = 38. CC  $\alpha S^{CH} / \alpha S^{CU}$  ratios vs. PMI  $r = 0.2$ ,  $R^2 = 0.04$ ,  $p = 0.2$ ,  $n$  pairs = 39. FC  $\alpha S^{CH} / \alpha S^{CU}$  vs. PMI  $r = -0.07$ ,  $R^2 = 0.005$ ,  $p = 0.6$ ,  $n$  pairs = 58. Striatum  $\alpha S^{CH} / \alpha S^{CU}$  ratios vs. PMI  $r = 0.1$ ,  $R^2 = 0.01$ ,  $p = 0.5$ ,  $n$  pairs = 34.

**Fig. S21 No significant correlation of  $\alpha S^{CH} / \alpha S^{CU}$  ratios and gender**

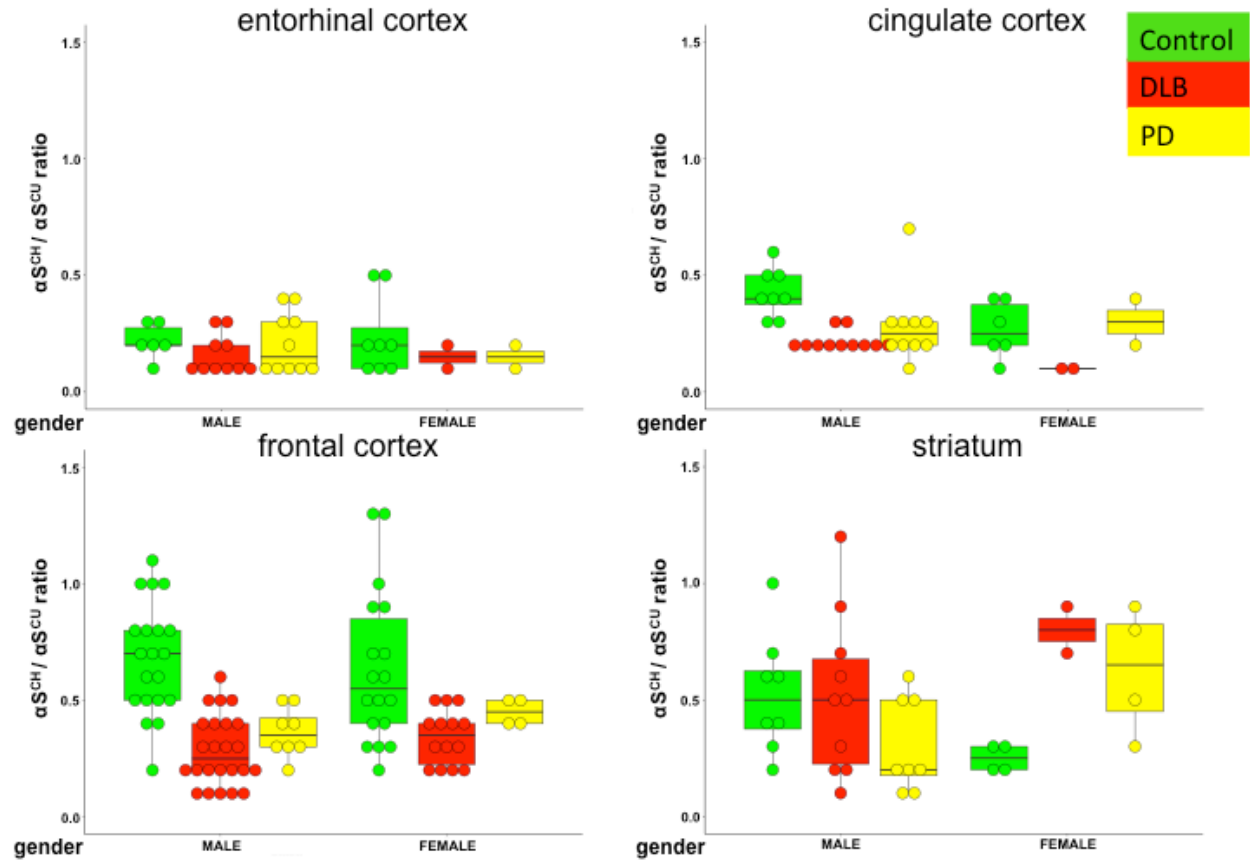

**Supplementary Fig. 21 No significant correlation of  $\alpha S^{CH} / \alpha S^{CU}$  ratios and gender.** Across different brain regions (entorhinal cortex (EC), cingulate cortex (CC), frontal cortex (FC) and striatum) no correlation of  $\alpha S^{CH} / \alpha S^{CU}$  ratios and gender was detected comparing controls to DLB patients and PD patients. EC  $\alpha S^{CH} / \alpha S^{CU}$  vs. gender  $r = 0.07$ ,  $R^2 = 0.004$ ,  $p = 0.7$ ,  $n$  pairs = 38. CC  $\alpha S^{CH} / \alpha S^{CU}$  ratios vs. gender  $r = -0.2$ ,  $R^2 = 0.03$ ,  $p = 0.3$ ,  $n$  pairs = 39. FC  $\alpha S^{CH} / \alpha S^{CU}$  ratios vs. gender  $r = 0.09$ ,  $R^2 = 0.009$ ,  $p = 0.4$ ,  $n$  pairs = 88. Striatum  $\alpha S^{CH} / \alpha S^{CU}$  ratios vs. gender  $r = 0.09$ ,  $R^2 = 0.008$ ,  $p = 0.6$ ,  $n$  pairs = 36.

**Fig. S22 Significant correlation of  $\alpha S^{CH} / \alpha S^{CU}$  ratios and age of the striatum but not entorhinal cortex, frontal cortex or cingulate cortex**

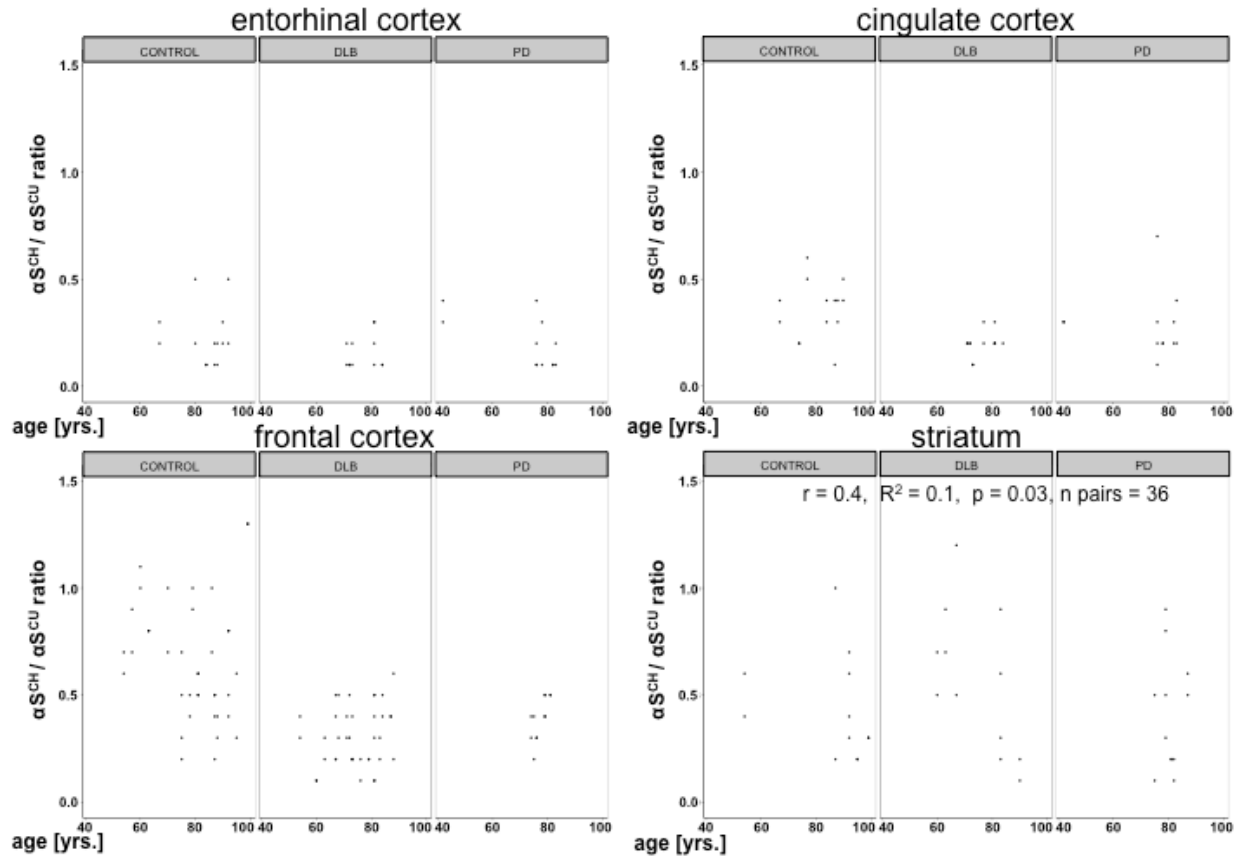

**Supplementary Fig. 22 Significant negative correlation of  $\alpha S^{CH} / \alpha S^{CU}$  ratios and age in the striatum.** In the striatum a significant negative correlation of  $\alpha S^{CH} / \alpha S^{CU}$  ratios and age (yrs. = years) was detected comparing controls to DLB patients and PD patients. Striatum  $\alpha S^{CH} / \alpha S^{CU}$  ratios vs. age  $r = -0.4$ ,  $R^2 = 0.1$ ,  $p = 0.02$ ,  $n \text{ pairs} = 36$ . No correlation could be found in the entorhinal cortex (EC), cingulate cortex (CC) or frontal cortex (FC) between  $\alpha S^{CH} / \alpha S^{CU}$  and age comparing controls to DLB patients and PD patients. EC  $\alpha S^{CH} / \alpha S^{CU}$  ratios vs. age  $r = -0.2$ ,  $R^2 = 0.04$ ,  $p = 0.3$ ,  $n \text{ pairs} = 38$ .  $\alpha S^{CH} / \alpha S^{CU}$  vs. age  $r = 0.1$ ,  $R^2 = 0.01$ ,  $p = 0.5$ ,  $n \text{ pairs} = 39$ . FC  $\alpha S^{CH} / \alpha S^{CU}$  vs. age  $r = 0.09$ ,  $R^2 = 0.009$ ,  $p = 0.4$ ,  $n \text{ pairs} = 88$ .

**Fig. S23 Significant positive correlation of  $\alpha S^{CH} / \alpha S^{CU}$  ratios and Braak neurofibrillary tangle (NFT) staging in the entorhinal cortex.**

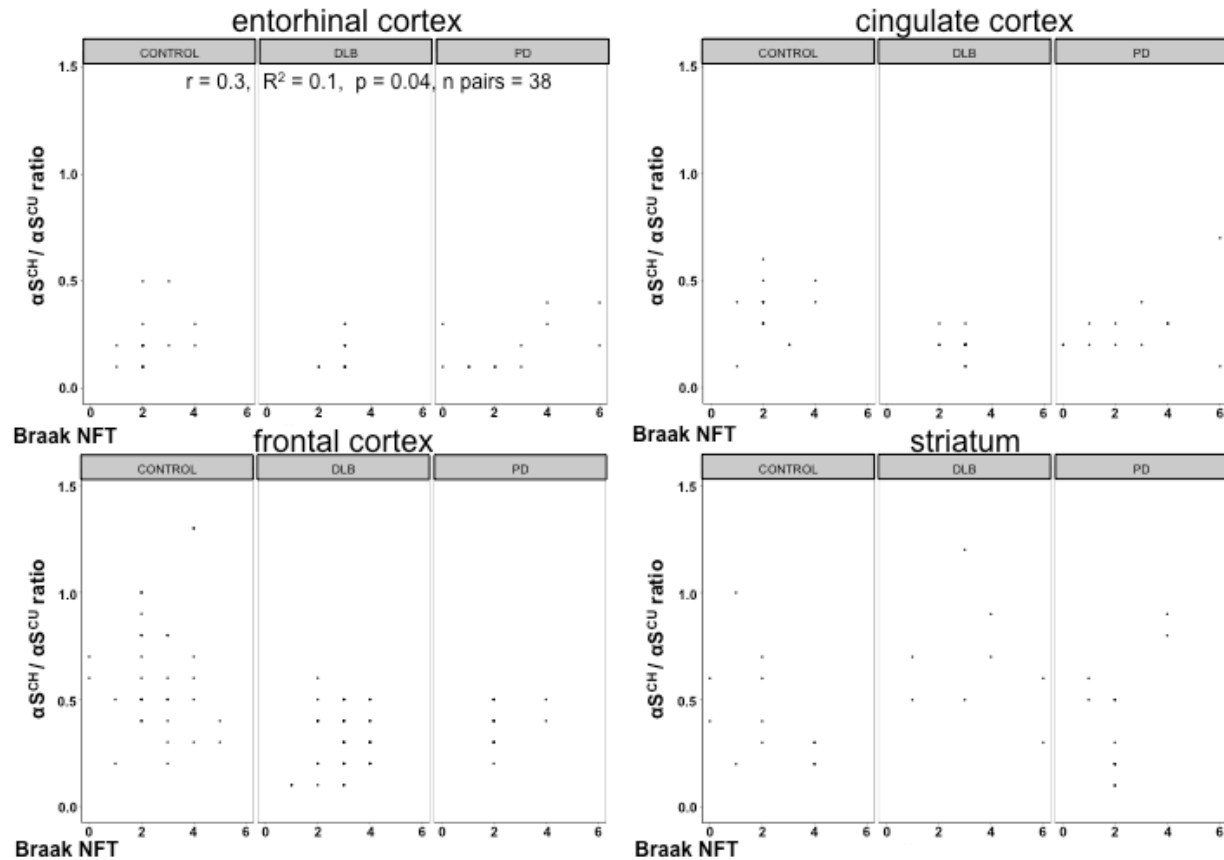

**Supplementary Fig. 23 Significant positive correlation of  $\alpha S^{CH} / \alpha S^{CU}$  ratios and Braak neurofibrillary tangle (NFT) staging in the entorhinal cortex.** In the entorhinal cortex (EC) a significant positive correlation of  $\alpha S^{CH} / \alpha S^{CU}$  ratios and Braak NFT staging (0, 1, 2, 3, 4, 5, 6) was detected comparing controls to DLB patients and PD patients. EC  $\alpha S^{CH} / \alpha S^{CU}$  ratios vs. Braak NFT staging  $r = 0.3$ ,  $R^2 = 0.1$ ,  $p = 0.04$ ,  $n \text{ pairs} = 38$ . No correlation could be found in the cingulate cortex (CC), frontal cortex (FC) or striatum between  $\alpha S^{CH} / \alpha S^{CU}$  ratios and Braak NFT staging comparing controls to DLB patients and PD patients. CC  $\alpha S^{CH} / \alpha S^{CU}$  ratios vs. Braak neurofibrillary tangle staging  $r = 0.2$ ,  $R^2 = 0.03$ ,  $p = 0.3$ ,  $n \text{ pairs} = 39$ . FC  $\alpha S^{CH} / \alpha S^{CU}$  ratios vs. Braak neurofibrillary tangle staging  $r = -0.007$ ,  $R^2 = 0.00005$ ,  $p = 1.0$ ,  $n \text{ pairs} = 78$ . Striatum  $\alpha S^{CH} / \alpha S^{CU}$  vs. Braak neurofibrillary tangle staging  $r = 0.05$ ,  $R^2 = 0.003$ ,  $p = 0.8$ ,  $n \text{ pairs} = 32$ .

**Fig. S24 No significant correlation of  $\alpha S^{CH} / \alpha S^{CU}$  ratios and CERAD score**

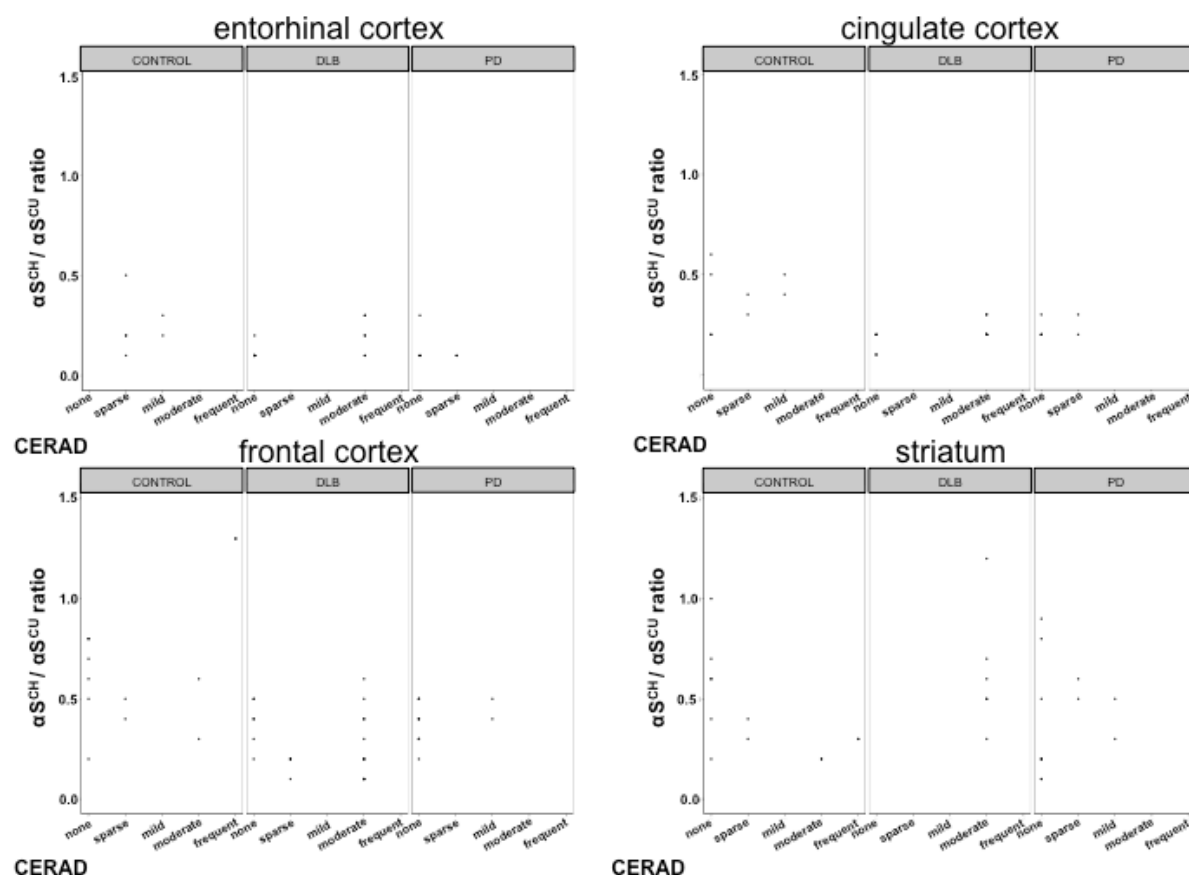

**Supplementary Fig. 24 No significant correlation of  $\alpha S^{CH} / \alpha S^{CU}$  ratios and CERAD (Consortium to Establish a Registry for Alzheimer's Disease) score.** Across different brain regions (entorhinal cortex (EC), cingulate cortex (CC), frontal cortex (FC) and striatum) no correlation of  $\alpha S^{CH} / \alpha S^{CU}$  ratios and CERAD score (none, sparse, mild, moderate and frequent) was detected comparing controls to DLB patients and PD patients. EC  $\alpha S^{CH} / \alpha S^{CU}$  ratios vs. CERAD  $r = 0.3$ ,  $R^2 = 0.09$ ,  $p = 0.2$ ,  $n$  pairs = 24. CC  $\alpha S^{CH} / \alpha S^{CU}$  ratios vs. CERAD  $r = -0.004$ ,  $R^2 = 0.00001$ ,  $p = 1.0$ ,  $n$  pairs = 27. FC  $\alpha S^{CH} / \alpha S^{CU}$  ratios vs. CERAD  $r = 0.09$ ,  $R^2 = 0.007$ ,  $p = 0.6$ ,  $n$  pairs = 46. Striatum  $\alpha S^{CH} / \alpha S^{CU}$  ratios vs. CERAD  $r = -0.01$ ,  $R^2 = 0.0001$ ,  $p = 1.0$ ,  $n$  pairs = 30

**Fig. S25 DLB and sPD patients exhibit higher levels of pathological, insoluble  $\alpha$ S compared to controls**

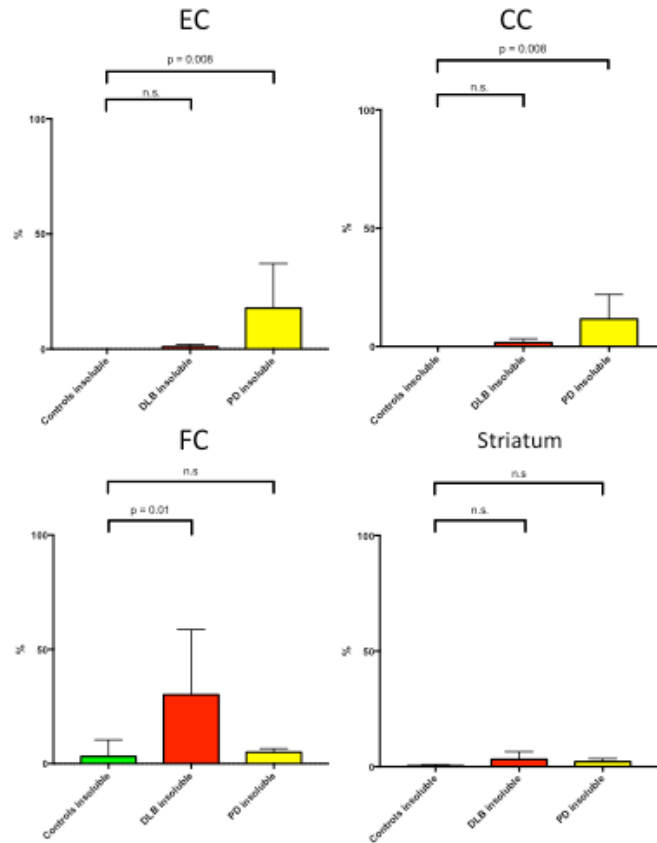

**Supplementary Fig. 25 PD and DLB patients exhibit higher levels of pathological, insoluble  $\alpha$ S compared to controls.** The procedure for the protein fractionation and the ELISA is described in the Methods section. The amount of each fraction was analyzed by ELISA and calculated as percentage for the overall  $\alpha$ S levels in each fraction (cytosol, membrane, insoluble). PD patients exhibit higher levels of pathological, insoluble  $\alpha$ S in early affected brain regions (entorhinal cortex (EC) and cingulate cortex (CC)) according to the classical caudal-rostral progression. DLB patients exhibiting early cortical involvement display higher levels of pathological, insoluble  $\alpha$ S in the frontal cortex (FC).



## References:

- 1 Dettmer U, Newman AJ, Luth ES, Bartels T, Selkoe D. In vivo cross-linking reveals principally oligomeric forms of  $\alpha$ -synuclein and  $\beta$ -synuclein in neurons and non-neural cells. *J Biol Chem*. 2013;288(9):6371-6385. doi:10.1074/jbc.M112.403311
- 2 Bartels T, Choi JG, Selkoe DJ.  $\alpha$ -Synuclein occurs physiologically as a helically folded tetramer that resists aggregation. *Nature*. 2011 Aug 14;477(7362):107-10. doi: 10.1038/nature10324. PMID: 21841800; PMCID: PMC3166366.

**Table S1. Mass Spectrometry Results of purified  $\alpha$ S from multiple sources**

| $\alpha$ S sample (gel piece)         | Accession | Description                              | Protein Group IDs | Coverage [%] | Unique Peptides | Protein Unique Peptides | AAs  | MW [kDa] | calc. pI | Abundances | Gene Symbol    |
|---------------------------------------|-----------|------------------------------------------|-------------------|--------------|-----------------|-------------------------|------|----------|----------|------------|----------------|
| mock 14 kDa                           | P81605    | Dermicidin                               | 11                | 20           | 3               | 3                       | 110  | 11.3     | 6.54     | 7.3E+06    | DCD            |
| mock 14 kDa                           | Q86YZ3    | Hornerin                                 | 4                 | 1            | 2               | 2                       | 2850 | 282.2    | 10.04    | 5.7E+06    | HRNR           |
| mock 14 kDa                           | P37840    | $\alpha$ -Synuclein                      | 12                | 21           | 4               | 2                       | 140  | 14.5     | 4.7      | 2.4E+06    | SNCA           |
| $\alpha$ S cytosolic unfolded, 14 kDa | P37840    | $\alpha$ -Synuclein                      | 19                | 40           | 9               | 5                       | 140  | 14.5     | 4.7      | 2.8E+07    | SNCA           |
| $\alpha$ S cytosolic unfolded, 14 kDa | Q86YZ3    | Hornerin                                 | 5                 | 3            | 3               | 3                       | 2850 | 282.2    | 10.04    | 2.0E+07    | HRNR           |
| $\alpha$ S cytosolic unfolded, 14 kDa | P14923    | Junction plakoglobin                     | 16                | 4            | 3               | 3                       | 745  | 81.7     | 6.14     | 6.9E+06    | JUP            |
| $\alpha$ S cytosolic unfolded, 14 kDa | P15924    | Desmoplakin                              | 13                | 1            | 5               | 5                       | 2871 | 331.6    | 6.81     | 3.0E+06    | DSP            |
| $\alpha$ S cytosolic unfolded, 14 kDa | P81605    | Dermicidin                               | 18                | 12           | 3               | 3                       | 110  | 11.3     | 6.54     | 1.7E+06    | DCD            |
| mock 80 kDa                           | P37840    | $\alpha$ -Synuclein                      | 24                | 52           | 12              | 9                       | 140  | 14.5     | 4.7      | 1.3E+08    | SNCA           |
| mock 80 kDa                           | Q86YZ3    | Hornerin                                 | 8                 | 3            | 2               | 2                       | 2850 | 282.2    | 10.04    | 1.7E+07    | HRNR           |
| mock 80 kDa                           | P0DMV8    | Heat shock 70 kDa protein                | 21                | 14           | 5               | 1                       | 641  | 70       | 5.66     | 7.2E+06    | HSPA1B; HSPA1A |
| mock 80 kDa                           | P15924    | Desmoplakin                              | 17                | 1            | 3               | 3                       | 2871 | 331.6    | 6.81     | 1.5E+06    | DSP            |
| mock 80 kDa                           | P81605    | Dermicidin                               | 23                | 21           | 2               | 2                       | 110  | 11.3     | 6.54     | 4.9E+05    | DCD            |
| $\alpha$ S cytosolic helical, 80 kDa  | P0DMV8    | Heat shock 70 kDa protein 1A             | 172               | 89           | 43              | 43                      | 641  | 70       | 5.66     | 1.6E+11    | HSPA1B; HSPA1A |
| $\alpha$ S cytosolic helical, 80 kDa  | P11021    | Endoplasmic reticulum chaperone BiP      | 151               | 57           | 40              | 40                      | 654  | 72.3     | 5.16     | 1.9E+10    | HSPA5          |
| $\alpha$ S cytosolic helical, 80 kDa  | P37840    | $\alpha$ -Synuclein                      | 200               | 81           | 11              | 9                       | 140  | 14.5     | 4.7      | 1.1E+10    | SNCA           |
| $\alpha$ S cytosolic helical, 80 kDa  | P11142    | Heat shock cognate 71 kDa protein        | 128               | 59           | 25              | 25                      | 646  | 70.9     | 5.52     | 6.7E+09    | HSPA8          |
| $\alpha$ S cytosolic helical, 80 kDa  | P38646    | Stress-70 protein, mitochondrial         | 205               | 44           | 25              | 25                      | 679  | 73.6     | 6.16     | 2.2E+09    | HSPA9          |
| $\alpha$ S cytosolic helical, 80 kDa  | P14136    | Glial fibrillary acidic protein          | 32                | 6            | 1               | 1                       | 432  | 49.9     | 5.52     | 1.4E+09    | GFAP           |
| $\alpha$ S cytosolic helical, 80 kDa  | P04406    | Glyceraldehyde-3-phosphate dehydrogenase | 147               | 59           | 14              | 13                      | 335  | 36       | 8.46     | 5.2E+08    | GAPDH          |
| $\alpha$ S cytosolic helical, 80 kDa  | P40926    | Malate dehydrogenase, mitochondrial      | 99                | 30           | 7               | 7                       | 338  | 35.5     | 8.68     | 3.3E+08    | MDH2           |
| $\alpha$ S cytosolic helical, 80 kDa  | P13667    | Protein disulfide-isomerase A4           | 34                | 25           | 13              | 13                      | 645  | 72.9     | 5.07     | 3.0E+08    | PDIA4          |
| $\alpha$ S cytosolic helical, 80 kDa  | P15924    | Desmoplakin                              | 113               | 8            | 23              | 23                      | 2871 | 331.6    | 6.81     | 1.9E+08    | DSP            |
| $\alpha$ S cytosolic helical, 80 kDa  | P49915    | GMP synthase                             | 70                | 15           | 7               | 7                       | 693  | 76.7     | 6.87     | 1.6E+08    | GMPS           |
| $\alpha$ S cytosolic helical, 80 kDa  | Q5D862    | Filaggrin-2                              | 106               | 2            | 5               | 5                       | 2391 | 247.9    | 8.31     | 1.6E+08    | FLG2           |
| $\alpha$ S cytosolic helical, 80 kDa  | P31944    | Caspase-14                               | 5                 | 30           | 7               | 7                       | 242  | 27.7     | 5.58     | 1.5E+08    | CASP14         |
| $\alpha$ S cytosolic helical, 80 kDa  | Q12931    | Heat shock protein 75 kDa, mitochondrial | 112               | 17           | 8               | 8                       | 704  | 80.1     | 8.21     | 1.5E+08    | TRAP1          |

|                              |        |                                          |     |    |    |    |      |       |      |         |          |
|------------------------------|--------|------------------------------------------|-----|----|----|----|------|-------|------|---------|----------|
| αS cytosolic helical, 80 kDa | Q02413 | Desmoglein-1                             | 108 | 17 | 12 | 12 | 1049 | 113.7 | 5.03 | 1.4E+08 | DSG1     |
| αS cytosolic helical, 80 kDa | P07237 | Protein disulfide-isomerase              | 96  | 31 | 11 | 11 | 508  | 57.1  | 4.87 | 1.0E+08 | P4HB     |
| αS cytosolic helical, 80 kDa | P10809 | 60 kDa heat shock protein, mitochondrial | 207 | 21 | 7  | 7  | 573  | 61    | 5.87 | 8.6E+07 | HSPD1    |
| αS cytosolic helical, 80 kDa | Q5T750 | Skin-specific protein 32                 | 211 | 4  | 2  | 2  | 250  | 26.2  | 7.97 | 7.5E+07 | C1orf68  |
| αS cytosolic helical, 80 kDa | P17066 | Heat shock 70 kDa protein 6              | 75  | 22 | 3  | 3  | 643  | 71    | 6.14 | 7.1E+07 | HSPA6    |
| αS cytosolic helical, 80 kDa | P08133 | Annexin A6                               | 11  | 27 | 15 | 15 | 673  | 75.8  | 5.6  | 7.1E+07 | ANXA6    |
| αS cytosolic helical, 80 kDa | P07355 | Annexin A2                               | 145 | 37 | 12 | 4  | 339  | 38.6  | 7.75 | 6.5E+07 | ANXA2    |
| αS cytosolic helical, 80 kDa | Q08554 | Desmocollin-1                            | 246 | 7  | 5  | 5  | 894  | 99.9  | 5.43 | 5.2E+07 | DSC1     |
| αS cytosolic helical, 80 kDa | P07195 | L-lactate dehydrogenase B chain          | 137 | 22 | 7  | 7  | 334  | 36.6  | 6.05 | 5.1E+07 | LDHB     |
| αS cytosolic helical, 80 kDa | P50395 | Rab GDP dissociation inhibitor beta      | 226 | 28 | 5  | 5  | 445  | 50.6  | 6.47 | 5.1E+07 | GDI2     |
| αS cytosolic helical, 80 kDa | Q15181 | Inorganic pyrophosphatase                | 63  | 21 | 4  | 4  | 289  | 32.6  | 5.86 | 5.0E+07 | PPA1     |
| αS cytosolic helical, 80 kDa | Q15084 | Protein disulfide-isomerase A6           | 210 | 9  | 2  | 2  | 440  | 48.1  | 5.08 | 4.7E+07 | PDIA6    |
| αS cytosolic helical, 80 kDa | P14923 | Junction plakoglobin                     | 153 | 12 | 8  | 7  | 745  | 81.7  | 6.14 | 4.5E+07 | JUP      |
| αS cytosolic helical, 80 kDa | P07900 | Heat shock protein HSP 90-α              | 43  | 15 | 5  | 4  | 732  | 84.6  | 5.02 | 4.3E+07 | HSP90AA1 |
| αS cytosolic helical, 80 kDa | P17812 | CTP synthase 1                           | 248 | 17 | 8  | 8  | 591  | 66.6  | 6.46 | 4.1E+07 | CTPS1    |
| αS cytosolic helical, 80 kDa | Q92945 | Far upstream element-binding protein 2   | 146 | 3  | 2  | 2  | 711  | 73.1  | 7.3  | 4.0E+07 | KHSRP    |
| αS cytosolic helical, 80 kDa | P14618 | Pyruvate kinase PKM                      | 222 | 17 | 6  | 5  | 531  | 57.9  | 7.84 | 3.5E+07 | PKM      |
| αS cytosolic helical, 80 kDa | P23526 | Adenosylhomocysteinase                   | 184 | 9  | 4  | 4  | 432  | 47.7  | 6.34 | 3.4E+07 | AHCY     |
| αS cytosolic helical, 80 kDa | P00338 | L-lactate dehydrogenase A chain          | 171 | 14 | 4  | 4  | 332  | 36.7  | 8.27 | 3.3E+07 | LDHA     |
| αS cytosolic helical, 80 kDa | P29401 | Transketolase                            | 102 | 12 | 5  | 5  | 623  | 67.8  | 7.66 | 2.9E+07 | TKT      |
| αS cytosolic helical, 80 kDa | P19623 | Spermidine synthase                      | 141 | 8  | 3  | 3  | 302  | 33.8  | 5.49 | 2.6E+07 | SRM      |
| αS cytosolic helical, 80 kDa | P13797 | Plastin-3                                | 203 | 17 | 9  | 6  | 630  | 70.8  | 5.6  | 2.6E+07 | PLS3     |
| αS cytosolic helical, 80 kDa | P40925 | Malate dehydrogenase, cytoplasmic        | 216 | 13 | 3  | 3  | 334  | 36.4  | 7.36 | 2.6E+07 | MDH1     |
| αS cytosolic helical, 80 kDa | Q13867 | Bleomycin hydrolase                      | 193 | 5  | 2  | 2  | 455  | 52.5  | 6.27 | 2.6E+07 | BLMH     |
| αS cytosolic helical, 80 kDa | P00491 | Purine nucleoside phosphorylase          | 185 | 34 | 7  | 7  | 289  | 32.1  | 6.95 | 2.5E+07 | PNP      |
| αS cytosolic helical, 80 kDa | P05089 | Arginase-1                               | 158 | 22 | 5  | 5  | 322  | 34.7  | 7.21 | 2.2E+07 | ARG1     |
| αS cytosolic helical, 80 kDa | P06733 | Alpha-enolase                            | 206 | 14 | 4  | 3  | 434  | 47.1  | 7.39 | 2.1E+07 | ENO1     |
| αS cytosolic helical, 80 kDa | P14625 | Endoplasmin                              | 15  | 11 | 6  | 4  | 803  | 92.4  | 4.84 | 2.1E+07 | HSP90B1  |
| αS cytosolic helical, 80 kDa | P54652 | Heat shock-related 70 kDa protein 2      | 92  | 38 | 8  | 8  | 639  | 70    | 5.74 | 2.0E+07 | HSPA2    |

|                              |        |                                                                 |     |    |   |   |     |      |      |         |           |
|------------------------------|--------|-----------------------------------------------------------------|-----|----|---|---|-----|------|------|---------|-----------|
| αS cytosolic helical, 80 kDa | P78371 | T-complex protein 1 subunit beta                                | 174 | 13 | 4 | 4 | 535 | 57.5 | 6.46 | 1.9E+07 | CCT2      |
| αS cytosolic helical, 80 kDa | Q96QA5 | Gasdermin-A                                                     | 230 | 9  | 3 | 3 | 445 | 49.3 | 5.29 | 1.8E+07 | GSDMA     |
| αS cytosolic helical, 80 kDa | Q96AE4 | Far upstream element-binding protein 1                          | 16  | 7  | 3 | 3 | 644 | 67.5 | 7.61 | 1.8E+07 | FUBP1     |
| αS cytosolic helical, 80 kDa | P36551 | Oxygen-dependent coproporphyrinogen -III oxidase, mitochondrial | 215 | 11 | 4 | 4 | 454 | 50.1 | 8.25 | 1.7E+07 | CPOX      |
| αS cytosolic helical, 80 kDa | P48147 | Prolyl endopeptidase OS=Homo sapiens                            | 67  | 4  | 2 | 2 | 710 | 80.6 | 5.86 | 1.5E+07 | PREP      |
| αS cytosolic helical, 80 kDa | P22234 | Multifunctional protein ADE2 OS=Homo sapiens                    | 115 | 8  | 2 | 2 | 425 | 47   | 7.23 | 1.5E+07 | PAICS     |
| αS cytosolic helical, 80 kDa | P38117 | Electron transfer flavoprotein subunit beta                     | 170 | 7  | 2 | 2 | 255 | 27.8 | 8.1  | 1.4E+07 | ETFB      |
| αS cytosolic helical, 80 kDa | P13639 | Elongation factor 2                                             | 179 | 10 | 6 | 6 | 858 | 95.3 | 6.83 | 1.3E+07 | EEF2      |
| αS cytosolic helical, 80 kDa | P07384 | Calpain-1 catalytic subunit                                     | 238 | 6  | 3 | 3 | 714 | 81.8 | 5.67 | 1.3E+07 | CAPN1     |
| αS cytosolic helical, 80 kDa | P26038 | Moesin                                                          | 116 | 14 | 4 | 4 | 577 | 67.8 | 6.4  | 1.3E+07 | MSN       |
| αS cytosolic helical, 80 kDa | P08238 | Heat shock protein HSP 90-beta                                  | 101 | 15 | 4 | 2 | 724 | 83.2 | 5.03 | 1.2E+07 | HSP90AB1  |
| αS cytosolic helical, 80 kDa | P62258 | 14-3-3 protein epsilon                                          | 247 | 13 | 3 | 2 | 255 | 29.2 | 4.74 | 1.2E+07 | YWHAE     |
| αS cytosolic helical, 80 kDa | O95302 | Peptidyl-prolyl cis-trans isomerase FKBP9                       | 103 | 3  | 2 | 2 | 570 | 63   | 5.08 | 1.2E+07 | FKBP9     |
| αS cytosolic helical, 80 kDa | P06576 | ATP synthase subunit beta, mitochondrial                        | 167 | 11 | 4 | 4 | 529 | 56.5 | 5.4  | 1.1E+07 | ATP5B     |
| αS cytosolic helical, 80 kDa | P32119 | Peroxioredoxin-2 OS=Homo sapiens                                | 244 | 27 | 3 | 3 | 198 | 21.9 | 5.97 | 1.1E+07 | PRDX2     |
| αS cytosolic helical, 80 kDa | P15311 | Ezrin                                                           | 127 | 11 | 3 | 3 | 586 | 69.4 | 6.27 | 1.1E+07 | EZR       |
| αS cytosolic helical, 80 kDa | Q04837 | Single-stranded DNA-binding protein, mitochondrial              | 39  | 16 | 2 | 2 | 148 | 17.2 | 9.6  | 1.1E+07 | SSBP1     |
| αS cytosolic helical, 80 kDa | Q98WD1 | Acetyl-CoA acetyltransferase, cytosolic                         | 132 | 14 | 3 | 3 | 397 | 41.3 | 6.92 | 1.0E+07 | ACAT2     |
| αS cytosolic helical, 80 kDa | P00505 | Aspartate aminotransferase, mitochondrial                       | 220 | 8  | 3 | 3 | 430 | 47.5 | 9.01 | 1.0E+07 | GOT2      |
| αS cytosolic helical, 80 kDa | P41250 | Glycine--tRNA ligase                                            | 240 | 9  | 4 | 4 | 739 | 83.1 | 7.03 | 9.4E+06 | GARS      |
| αS cytosolic helical, 80 kDa | P19338 | Nucleolin                                                       | 178 | 11 | 6 | 6 | 710 | 76.6 | 4.7  | 8.2E+06 | NCL       |
| αS cytosolic helical, 80 kDa | Q00839 | Heterogeneous nuclear ribonucleoprotein U                       | 136 | 4  | 2 | 2 | 825 | 90.5 | 6    | 7.8E+06 | HNRNPU    |
| αS cytosolic helical, 80 kDa | Q99798 | Aconitate hydratase, mitochondrial                              | 225 | 4  | 2 | 2 | 780 | 85.4 | 7.61 | 7.8E+06 | ACO2      |
| αS cytosolic helical, 80 kDa | P34932 | Heat shock 70 kDa protein 4                                     | 129 | 6  | 4 | 4 | 840 | 94.3 | 5.19 | 7.8E+06 | HSPA4     |
| αS cytosolic helical, 80 kDa | P26639 | Threonine--tRNA ligase, cytoplasmic                             | 148 | 3  | 2 | 2 | 723 | 83.4 | 6.67 | 7.8E+06 | TARS      |
| αS cytosolic helical, 80 kDa | Q96P63 | Serpin B12 OS=Homo sapiens                                      | 152 | 11 | 4 | 4 | 405 | 46.2 | 5.53 | 7.8E+06 | SERPINB12 |

|                                      |        |                                                             |     |    |    |    |      |       |      |         |                |
|--------------------------------------|--------|-------------------------------------------------------------|-----|----|----|----|------|-------|------|---------|----------------|
| $\alpha$ S cytosolic helical, 80 kDa | P30101 | Protein disulfide-isomerase A3                              | 159 | 4  | 2  | 2  | 505  | 56.7  | 6.35 | 7.4E+06 | PDIA3          |
| $\alpha$ S cytosolic helical, 80 kDa | P61604 | 10 kDa heat shock protein, mitochondrial                    | 114 | 29 | 3  | 3  | 102  | 10.9  | 8.92 | 7.3E+06 | HSPE1          |
| $\alpha$ S cytosolic helical, 80 kDa | Q01813 | ATP-dependent 6-phosphofructokinase, platelet type          | 104 | 6  | 2  | 1  | 784  | 85.5  | 7.55 | 5.1E+06 | PFKP           |
| $\alpha$ S cytosolic helical, 80 kDa | P26641 | Elongation factor 1-gamma                                   | 4   | 5  | 2  | 2  | 437  | 50.1  | 6.67 | 5.0E+06 | EEF1G          |
| $\alpha$ S cytosolic helical, 80 kDa | O00154 | Cytosolic acyl coenzyme A thioester hydrolase               | 224 | 6  | 2  | 2  | 380  | 41.8  | 8.54 | 4.9E+06 | ACOT7          |
| $\alpha$ S cytosolic helical, 80 kDa | Q96P16 | Regulation of nuclear pre-mRNA domain-containing protein 1A | 27  | 5  | 2  | 2  | 312  | 35.7  | 7.55 | 4.8E+06 | RPRD1A         |
| $\alpha$ S cytosolic helical, 80 kDa | P31150 | Rab GDP dissociation inhibitor alpha                        | 62  | 14 | 1  | 1  | 447  | 50.6  | 5.14 | 4.8E+06 | GDI1           |
| $\alpha$ S cytosolic helical, 80 kDa | Q9UI42 | Carboxypeptidase A4                                         | 9   | 7  | 2  | 2  | 421  | 47.3  | 6.7  | 4.7E+06 | CPA4           |
| $\alpha$ S cytosolic helical, 80 kDa | P50991 | T-complex protein 1 subunit delta                           | 38  | 5  | 2  | 2  | 539  | 57.9  | 7.83 | 4.2E+06 | CCT4           |
| $\alpha$ S cytosolic helical, 80 kDa | P22735 | Protein-glutamine gamma-glutamyltransferase K               | 30  | 5  | 3  | 3  | 817  | 89.7  | 6.04 | 4.0E+06 | TGM1           |
| $\alpha$ S cytosolic helical, 80 kDa | Q08188 | Protein-glutamine gamma-glutamyltransferase E               | 23  | 13 | 8  | 8  | 693  | 76.6  | 5.86 | 3.9E+06 | TGM3           |
| $\alpha$ S cytosolic helical, 80 kDa | P37837 | Transaldolase OS=Homo sapiens                               | 202 | 7  | 2  | 2  | 337  | 37.5  | 6.81 | 3.8E+06 | TALDO1         |
| $\alpha$ S cytosolic helical, 80 kDa | P08670 | Vimentin                                                    | 41  | 5  | 1  | 1  | 466  | 53.6  | 5.12 | 3.8E+06 | VIM            |
| $\alpha$ S cytosolic helical, 80 kDa | Q8NBF2 | NHL repeat-containing protein 2                             | 255 | 7  | 4  | 4  | 726  | 79.4  | 5.55 | 3.5E+06 | NHLRC2         |
| $\alpha$ S cytosolic helical, 80 kDa | P25786 | Proteasome subunit alpha type-1                             | 60  | 10 | 2  | 2  | 263  | 29.5  | 6.61 | 3.3E+06 | PSMA1          |
| $\alpha$ S cytosolic helical, 80 kDa | P09960 | Leukotriene A-4 hydrolase                                   | 236 | 6  | 2  | 2  | 611  | 69.2  | 6.18 | 2.8E+06 | LTA4H          |
| $\alpha$ S cytosolic helical, 80 kDa | O43175 | D-3-phosphoglycerate dehydrogenase                          | 66  | 6  | 3  | 3  | 533  | 56.6  | 6.71 | 2.5E+06 | PHGDH          |
| $\alpha$ S cytosolic helical, 80 kDa | P16278 | Beta-galactosidase                                          | 76  | 5  | 3  | 3  | 677  | 76    | 6.57 | 2.2E+06 | GLB1           |
| $\alpha$ S cytosolic helical, 80 kDa | O95757 | Heat shock 70 kDa protein 4L                                | 74  | 3  | 2  | 2  | 839  | 94.5  | 5.88 | 1.6E+06 | HSPA4L         |
| E. coli recombinant $\alpha$ S       | P0DMV8 | Heat shock 70 kDa protein 1A                                | 23  | 49 | 34 | 17 | 641  | 70    | 5.66 | 2.6E+09 | HSPA1B; HSPA1A |
| E. coli recombinant $\alpha$ S       | P37840 | Alpha-synuclein                                             | 26  | 69 | 16 | 12 | 140  | 14.5  | 4.7  | 1.3E+09 | SNCA           |
| E. coli recombinant $\alpha$ S       | P11021 | Endoplasmic reticulum chaperone BiP                         | 20  | 19 | 9  | 9  | 654  | 72.3  | 5.16 | 2.0E+08 | HSPA5          |
| E. coli recombinant $\alpha$ S       | P11142 | Heat shock cognate 71 kDa protein                           | 18  | 22 | 7  | 5  | 646  | 70.9  | 5.52 | 6.1E+07 | HSPA8          |
| E. coli recombinant $\alpha$ S       | P38646 | Stress-70 protein, mitochondrial                            | 27  | 4  | 3  | 3  | 679  | 73.6  | 6.16 | 2.8E+07 | HSPA9          |
| E. coli recombinant $\alpha$ S       | P0ACF8 | DNA-binding protein H-NS                                    | 29  | 15 | 3  | 3  | 137  | 15.5  | 5.47 | 1.6E+07 | hns            |
| E. coli recombinant $\alpha$ S       | P02452 | Collagen alpha-1(I) chain                                   | 15  | 1  | 2  | 2  | 1464 | 138.9 | 5.8  | 9.1E+06 | COL1A1         |

|                                |        |                           |    |   |   |   |      |       |       |         |        |
|--------------------------------|--------|---------------------------|----|---|---|---|------|-------|-------|---------|--------|
| E. coli recombinant $\alpha$ S | Q86YZ3 | Hornerin                  | 8  | 3 | 2 | 2 | 2850 | 282.2 | 10.04 | 4.1E+06 | HRNR   |
| E. coli recombinant $\alpha$ S | P08123 | Collagen alpha-2(I) chain | 22 | 1 | 2 | 2 | 1366 | 129.2 | 8.95  | 3.0E+06 | COL1A2 |

### Table S1

Mass spectrometry data of  $\alpha$ S from HEK. The detailed procedure is described in the methods section. HEK293  $\alpha$ S C-term Strep II-tagged lysates were crosslinked and  $\alpha$ S<sup>CH</sup> and  $\alpha$ S<sup>CU</sup> were immunoprecipitated using StrepTrap 5ml columns.  $\alpha$ S<sup>CH</sup> and  $\alpha$ S<sup>CU</sup> were separated via size exclusion chromatography, run on a SDS-gel and gel pieces were lyophilized prior Mass spectrometry analysis. Lyophilized gel pieces were digested with trypsin. The quantification analysis was based on protein-specific peptides. For the mock sample, regular HEK293 were used. To further exclude false positive hits, recombinant  $\alpha$ S<sup>CU</sup> was analyzed as well. The mock  $\alpha$ S from regular HEK has a low abundance of  $\alpha$ S, depicting  $\alpha$ S<sup>CU</sup> remnants from HEK trapped in the StrepTrap column. The  $\alpha$ S from the 80 kDa gel piece exhibits 100 times more  $\alpha$ S than the mock 80 kDa sample and the false discovery rate of proteins in these samples is 0.6 %. The E. coli samples shows several false positive hits including HSP70. The data show that the most abundant protein in the  $\alpha$ S<sup>CH</sup> sample is indeed  $\alpha$ S.

**Table S2. Information on samples, crosslinking spread analysis (9 brain regions)**

| Individual       | PMI<br>[hours] | Dementia | Age at death<br>[years] | Disease duration<br>[years] | Gender | Thal score | B&B<br>tau staging | CERAD<br>score | Braak<br>Lewy Body<br>staging | McKeith<br>staging  |
|------------------|----------------|----------|-------------------------|-----------------------------|--------|------------|--------------------|----------------|-------------------------------|---------------------|
| <b>Control 1</b> | 79             | No       | 84                      | n.a.                        | Male   | 0          | 0                  | Absent         | 0                             | None                |
| <b>Control 2</b> | 120            | No       | 86                      | n.a.                        | Female | 0          | 2                  | Absent         | 0                             | None                |
| <b>Control 3</b> | 105            | No       | 79                      | n.a.                        | Male   | 0          | 2                  | Absent         | 0                             | None                |
| <b>PD 1</b>      | 24             | No       | 63                      | 21                          | Male   | 0          | 1                  | Absent         | 6                             | Diffuse neocortical |
| <b>PD 2</b>      | 25             | No       | 70                      | 27                          | Female | 1          | 1                  | Absent         | 6                             | Diffuse neocortical |
| <b>PD 3</b>      | 87             | No       | 76                      | 15                          | Female | 0          | 1                  | Absent         | 6                             | Diffuse neocortical |
| <b>DLB 1</b>     | 55             | Yes      | 79                      | 10                          | Male   | 4          | 2                  | Sparse         | 6                             | Diffuse Neocortical |
| <b>DLB 2</b>     | 56             | Yes      | 79                      | 10                          | Male   | 4          | 2                  | Sparse         | 6                             | Diffuse Neocortical |
| <b>DLB 3</b>     | 24             | Yes      | 60                      | 8                           | Male   | 1          | 1                  | Moderate       | 6                             | Diffuse Neocortical |

PD = Parkinson's disease, DLB = Dementia with Lewy bodies, B&B = Braak and Braak,  
CERAD = Consortium to Establish a Registry for Alzheimer's Disease
